# Supplementary material for: Synergistic Effect of Diet and Physical Activity on a NAFLD Cohort: Metabolomics Profile and Clinical Variable Evaluation
Source: MDPI journal article supplement (doi:10.3390/nu15112457), 2023-05-25
Supplement: s1 [file s1]

# Synergistic Effect of Diet and Physical Activity on a NAFLD Cohort: Metabolomics Profile and Clinical Variable Evaluation

Francesco Maria Calabrese <sup>1</sup>, Giuseppe Celano <sup>1,\*</sup>, Caterina Bonfiglio <sup>2</sup>, Angelo Campanella <sup>2</sup>, Isabella Franco <sup>2</sup>, Alessandro Annunziato <sup>1</sup>, Gianluigi Giannelli <sup>2</sup>, Alberto Ruben Osella <sup>2,\*†</sup> and Maria De Angelis <sup>1,†</sup>

<sup>1</sup> Department of Soil, Plant and Food Science, University of Bari Aldo Moro, 70126 Bari, Italy; francesco.calabrese@uniba.it (F.M.C.); alessandro.annunziato@uniba.it (A.A.); maria.deangelis@uniba.it (M.D.A.)

<sup>2</sup> National Institute of Gastroenterology S. De Bellis, IRCCS Research Hospital, Via Turi 27, 70013 Castellana Grotte, Italy; catia.bonfiglio@irccsdebellis.it (C.B.); angelo.campanella@irccsdebellis.it (A.C.); isabella.franco@irccsdebellis.it (I.F.); gianluigi.giannelli@irccsdebellis.it (G.G.)

\* Correspondence: giuseppe.celano@uniba.it (G.C.); arosella@irccsdebellis.it (A.R.O.); Tel.: +39-0805442950 (G.C.); +39-0804994655 (A.R.O.)

† These authors equally contributed to the paper.

## Supplementary Figure S1. Factor associated eigenvalues.

Scree plot reporting the eigenvalues for each one of the 28 identified factors resulting from biochemical clinical parameter measurements.

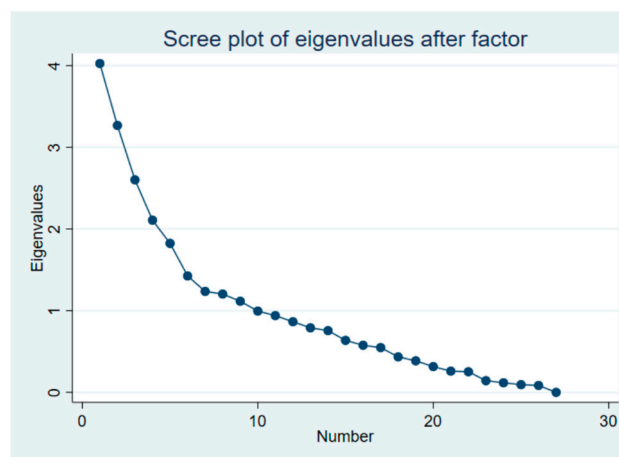

# Supplementary Figure S2. MaAsLin2 associations between combined versus single intervention groups.

Aerobic and non-aerobic physical activities (ATFIS), and the combination with Mediterranean diet intervention groups (LGIMD-ATFIS) were compared by means of the linear regression model (MaAsLin2), determining the multivariable associations between the phenotypes. Taxa relative abundances were reported on the Y axis. Only statistically significant association have been plotted.

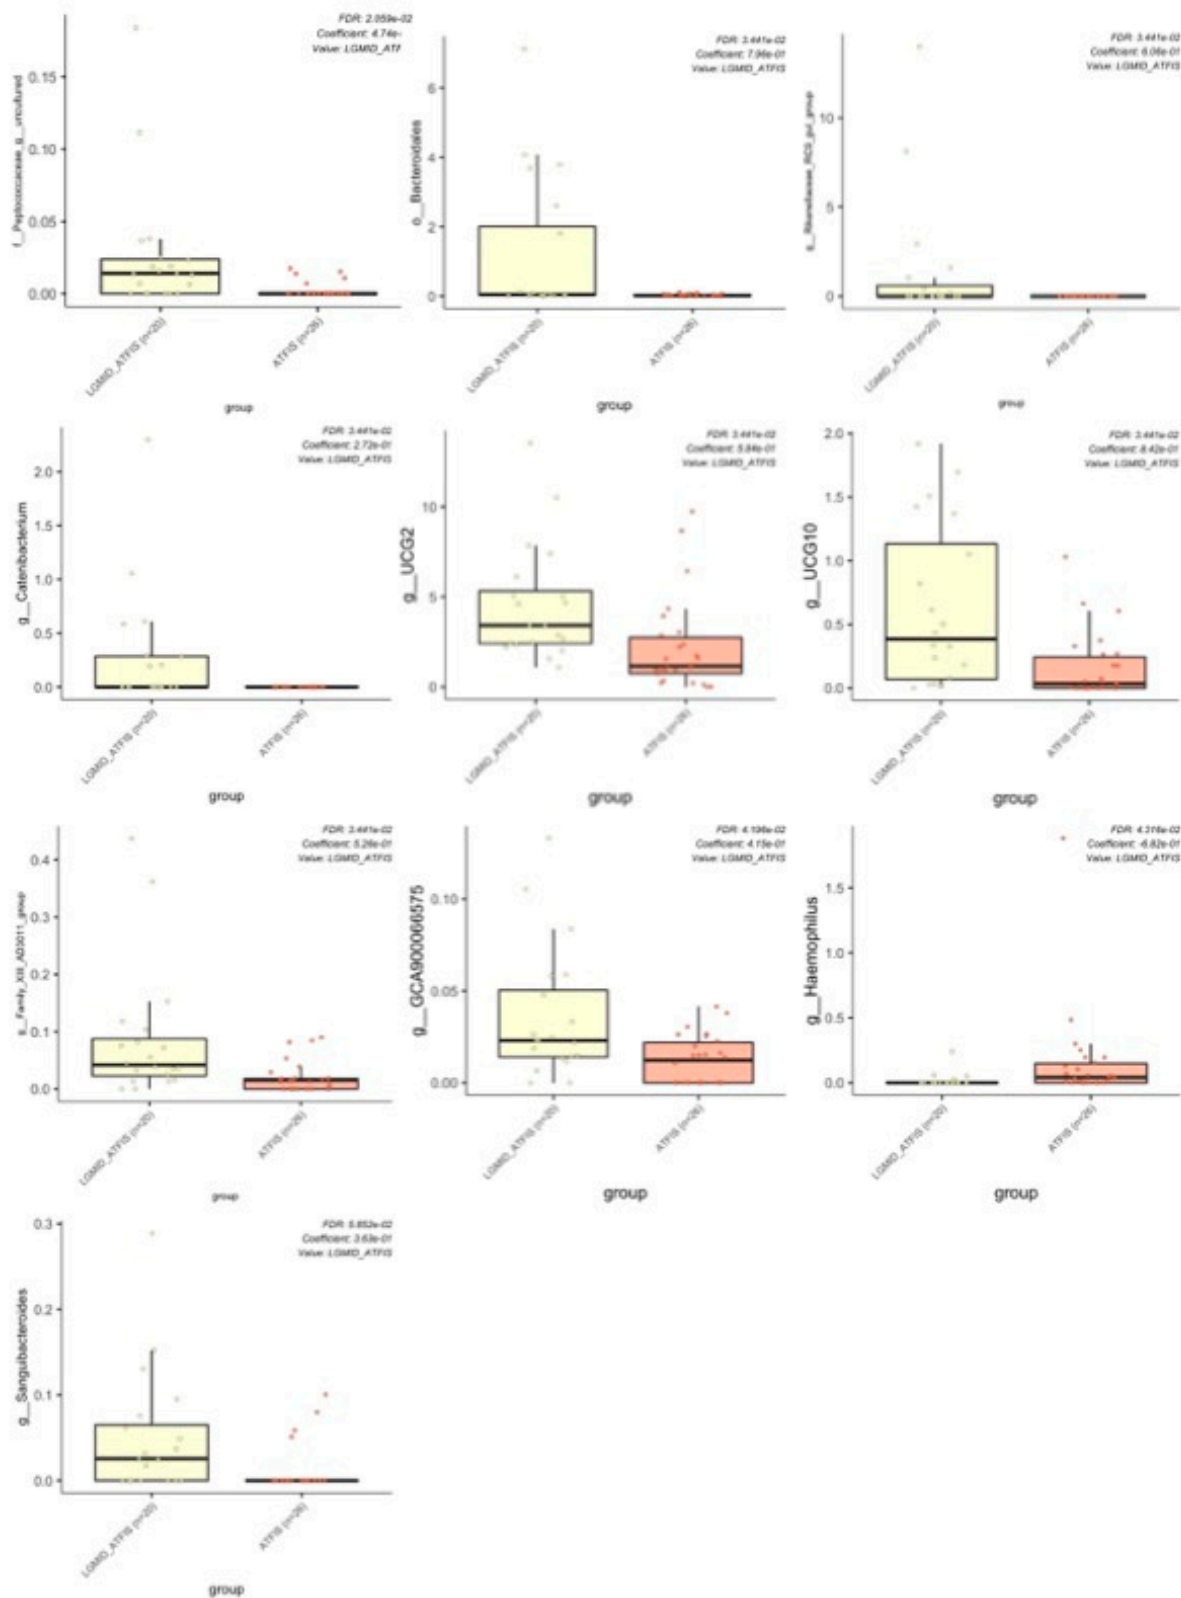

**Supplementary Figure S3. Person correlation analysis between statistically significant VOCs and 16S rRNA annotated taxa.** Annotated taxa from 16S rRNA sequencing experiment and volatile organic compounds that significantly differed in the ATFIS and LGIMD/ATFIS groups were correlated by means of a Pearson's test and only statically significant comparisons ( $p < 0.05$ ) were plotted. Black and red fonts mark biochemical parameters and VOCs, respectively. In the legend scale bar, green and purple colours are meaningful of positive and negative correlation, respectively. The cross-group paired variables were highlighted with red (positive) and green (negative) background colour, respectively.

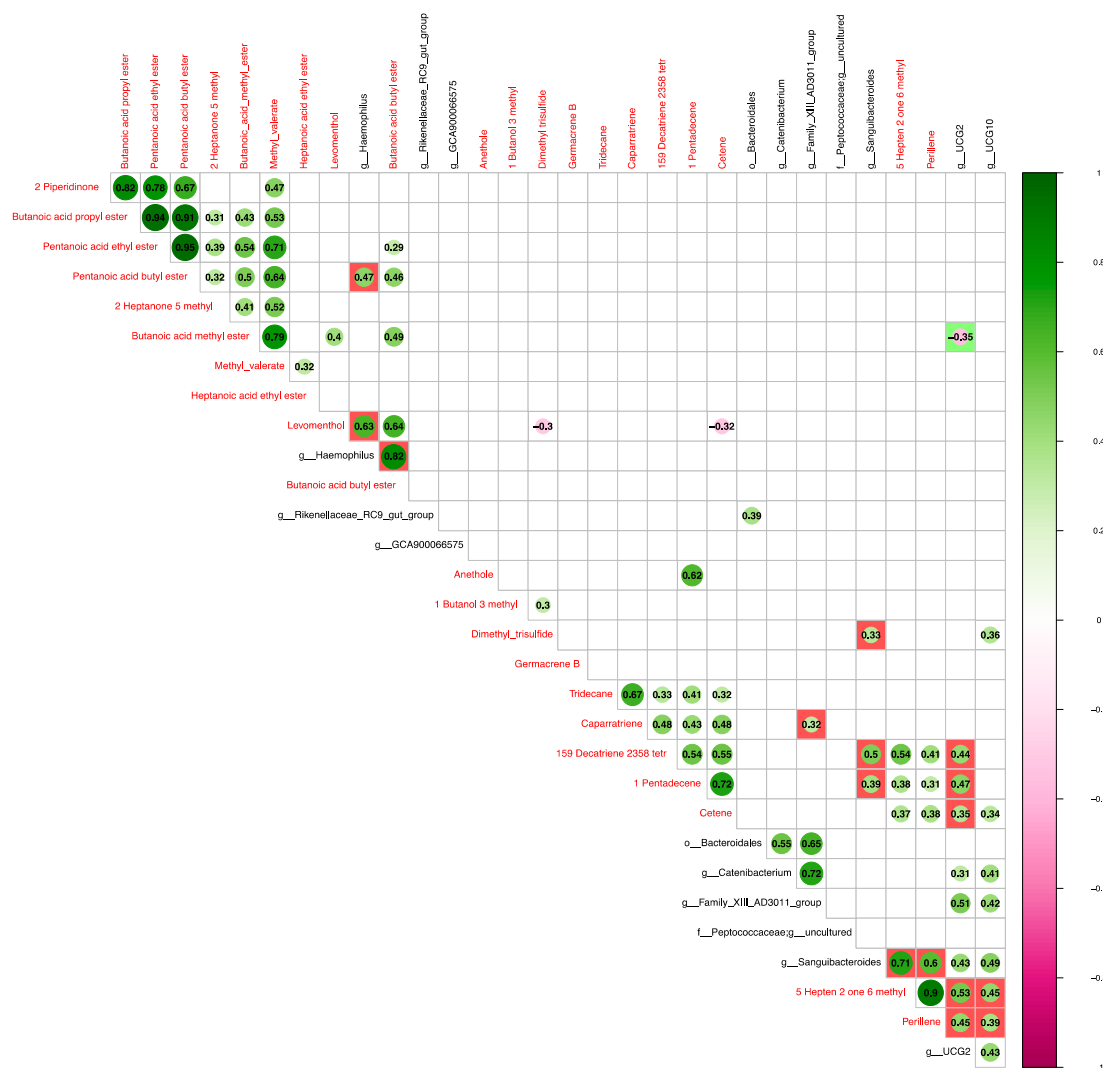

**Table S1. Complete panel of detected VOCs.** Concentration of volatile organic metabolites from an untargeted GC-MS metabolomics experiment.

[illegible]

|                               |       |       |       |       |       |       |       |       |         |       |
|-------------------------------|-------|-------|-------|-------|-------|-------|-------|-------|---------|-------|
| 2-Butanone                    | 0.060 | 0.297 | 0.044 | 0.081 | 0.302 | 1.128 | 0.018 | 0.040 | 0.181   | 0.216 |
| Butanal_3-methyl-             | 0.761 | 1.705 | 0.580 | 0.598 | 3.987 | 3.477 | 1.462 | 0.963 | 2.095   | 1.262 |
| Ethanol                       | 0.175 | 0.111 | 0.146 | 0.102 | 0.113 | 0.159 | 0.000 | 0.000 | 0.000   | 0.035 |
| Propanoic_acid_ethyl ester    | 0.000 | 0.000 | 0.118 | 0.000 | 0.000 | 0.000 | 0.000 | 0.000 | 0.000   | 0.000 |
| 2-Pentanone                   | 0.000 | 0.000 | 0.378 | 0.233 | 0.246 | 0.406 | 0.000 | 0.000 | 0.375   | 0.454 |
| Butanoic_acid_methyl ester    | 0.000 | 0.000 | 0.269 | 0.000 | 0.000 | 0.000 | 0.000 | 0.000 | 0.000   | 0.000 |
| Methyl_Isobutyl_Ketone        | 0.286 | 0.259 | 0.039 | 0.049 | 0.082 | 0.062 | 0.052 | 0.059 | 0.086   | 0.057 |
| a-Pinene                      | 0.000 | 0.000 | 0.000 | 0.000 | 0.132 | 0.000 | 0.113 | 0.283 | 0.932   | 0.186 |
| Disulfide_dimethyl            | 0.272 | 0.227 | 0.301 | 0.072 | 0.144 | 0.000 | 0.000 | 0.077 | 0.824   | 0.000 |
| Butanoic_acid_3-methyl- ethyl | 0.100 | 0.027 | 0.000 | 0.031 | 0.000 | 0.000 | 0.000 | 0.000 | 0.000   | 0.000 |
| Methyl_valerate               | 0.000 | 0.000 | 0.096 | 0.000 | 0.000 | 0.000 | 0.000 | 0.000 | 0.000   | 0.000 |
| b-Pinene                      | 0.000 | 0.000 | 0.000 | 0.000 | 0.115 | 0.000 | 0.152 | 0.430 | 4.264   | 0.135 |
| Butanoic_acid_propyl ester    | 0.272 | 0.000 | 0.747 | 0.000 | 0.000 | 0.000 | 0.000 | 0.000 | 0.000   | 0.000 |
| 3-Carene                      | 0.000 | 0.000 | 0.000 | 0.000 | 0.197 | 0.000 | 0.512 | 1.140 | 0.127   | 0.000 |
| Pentanoic_acid_ethyl ester    | 0.257 | 0.000 | 0.490 | 0.000 | 0.000 | 0.000 | 0.000 | 0.000 | 0.000   | 0.000 |
| (2E4E)-37-Dimethylocta-24-d   | 0.000 | 0.000 | 0.000 | 0.129 | 0.000 | 0.000 | 0.157 | 0.149 | 0.000   | 0.000 |
| a-Phellandrene                | 0.000 | 0.000 | 0.000 | 0.000 | 0.000 | 0.000 | 0.189 | 0.142 | 0.000   | 0.028 |
| b-Myrcene                     | 0.000 | 0.000 | 0.000 | 0.000 | 0.000 | 0.000 | 0.067 | 0.000 | 1.494   | 0.135 |
| Isovaleric_acid_propyl ester  | 0.000 | 0.000 | 0.000 | 0.000 | 0.000 | 0.000 | 0.000 | 0.000 | 0.000   | 0.000 |
| Terpinolene                   | 0.000 | 0.000 | 0.000 | 0.000 | 0.000 | 0.000 | 0.000 | 0.000 | 0.000   | 0.262 |
| 1-Butanol                     | 0.664 | 0.000 | 1.317 | 0.348 | 0.000 | 0.000 | 0.024 | 0.000 | 0.000   | 0.000 |
| D-Limonene                    | 4.599 | 2.714 | 0.573 | 0.202 | 0.212 | 0.303 | 0.488 | 0.260 | 117.502 | 0.736 |
| beta-Phellandrene             | 0.000 | 0.000 | 0.000 | 0.000 | 0.000 | 0.000 | 0.000 | 0.100 | 0.000   | 0.205 |
| Butanoic_acid_butyl ester     | 0.000 | 0.000 | 0.801 | 0.036 | 0.000 | 0.000 | 0.000 | 0.000 | 0.000   | 0.000 |
| Pentanoic_acid_propyl ester   | 0.000 | 0.000 | 0.314 | 0.000 | 0.000 | 0.000 | 0.000 | 0.000 | 0.000   | 0.000 |
| g-Terpinene                   | 0.307 | 0.000 | 0.000 | 0.000 | 0.000 | 0.000 | 0.045 | 0.161 | 6.227   | 0.917 |
| Hexanoic_acid_ethyl ester     | 0.091 | 0.000 | 1.106 | 0.109 | 0.000 | 0.000 | 0.000 | 0.000 | 0.000   | 0.085 |
| 1-Butanol_3-methyl-           | 0.253 | 0.000 | 0.000 | 0.000 | 0.125 | 0.000 | 0.000 | 0.086 | 0.115   | 0.000 |
| b-Ocimene                     | 0.000 | 0.000 | 0.000 | 0.000 | 0.058 | 0.000 | 0.000 | 0.000 | 0.195   | 0.002 |
| Styrene                       | 0.000 | 0.000 | 0.000 | 0.114 | 0.000 | 0.000 | 0.029 | 0.000 | 0.000   | 0.000 |
| p-Cymene                      | 0.000 | 0.000 | 0.000 | 0.000 | 0.000 | 0.237 | 0.031 | 0.193 | 0.526   | 0.908 |
| 2-Heptanone_5-methyl-         | 0.000 | 0.000 | 0.000 | 0.000 | 0.090 | 0.000 | 0.023 | 0.000 | 0.000   | 0.000 |
| 2-Carene                      | 0.000 | 0.000 | 0.000 | 0.000 | 0.000 | 0.000 | 0.000 | 0.000 | 0.305   | 0.000 |
| 1-Pentanol                    | 0.192 | 0.000 | 0.319 | 0.153 | 0.000 | 0.000 | 0.030 | 0.000 | 0.108   | 0.000 |
| Acetic_acid_hexyl ester       | 0.000 | 0.000 | 0.000 | 0.000 | 0.000 | 0.000 | 0.000 | 0.000 | 0.000   | 0.000 |
| Pentanoic_acid_4-methyl- pent | 0.000 | 0.000 | 0.000 | 0.000 | 0.000 | 0.000 | 0.000 | 0.000 | 0.000   | 0.000 |
| Octanal                       | 0.116 | 0.000 | 0.000 | 0.000 | 0.000 | 0.000 | 0.000 | 0.000 | 0.000   | 0.000 |
| 2-Octanone                    | 0.000 | 0.000 | 0.068 | 0.124 | 0.251 | 0.055 | 0.000 | 0.000 | 0.438   | 0.214 |
| Acetoin                       | 0.000 | 0.000 | 0.000 | 0.000 | 0.079 | 0.000 | 0.000 | 0.000 | 0.000   | 0.000 |
| Pentanoic_acid_butyl ester    | 0.082 | 0.000 | 0.574 | 0.023 | 0.000 | 0.000 | 0.000 | 0.000 | 0.000   | 0.000 |

|                               |        |       |        |       |        |        |        |       |       |       |
|-------------------------------|--------|-------|--------|-------|--------|--------|--------|-------|-------|-------|
| Butanoic_acid_pentyl ester    | 0.181  | 0.000 | 0.000  | 0.000 | 0.000  | 0.000  | 0.000  | 0.000 | 0.000 | 0.000 |
| Hexanoic_acid_propyl ester    | 0.000  | 0.000 | 0.638  | 0.037 | 0.000  | 0.000  | 0.000  | 0.000 | 0.000 | 0.032 |
| Tridecane                     | 0.000  | 0.000 | 0.000  | 0.038 | 0.054  | 0.011  | 0.000  | 0.026 | 0.065 | 0.000 |
| 5-Hepten-2-one_6-methyl-      | 0.000  | 6.294 | 10.022 | 9.080 | 15.438 | 92.711 | 4.963  | 4.082 | 2.421 | 5.000 |
| Heptanoic_acid_ethyl ester    | 0.000  | 0.000 | 0.000  | 0.000 | 0.000  | 0.000  | 0.000  | 0.000 | 0.000 | 0.000 |
| Dimethyl_trisulfide           | 0.286  | 0.000 | 0.495  | 0.000 | 0.000  | 0.000  | 0.000  | 0.000 | 0.411 | 0.000 |
| Allyl_Isothiocyanate          | 0.000  | 0.000 | 0.000  | 0.000 | 0.000  | 0.000  | 0.000  | 0.000 | 0.000 | 0.000 |
| 2-Hydroxy-3-pentanone         | 0.000  | 0.000 | 0.000  | 0.000 | 0.000  | 0.000  | 0.000  | 0.000 | 0.000 | 0.000 |
| Hexanoic_acid_isobutyl ester  | 0.000  | 0.000 | 0.000  | 0.000 | 0.000  | 0.000  | 0.000  | 0.000 | 0.000 | 0.000 |
| 2-butyl-1-octanol             | 0.096  | 0.148 | 0.000  | 0.000 | 0.001  | 0.444  | 0.055  | 0.007 | 0.054 | 0.121 |
| Cyclohexanecarboxylic acid me | 0.000  | 0.000 | 0.120  | 0.051 | 0.000  | 0.000  | 0.021  | 0.000 | 0.000 | 0.000 |
| 1-Hexanol                     | 0.000  | 0.000 | 0.734  | 0.419 | 0.000  | 0.000  | 0.000  | 0.000 | 0.081 | 0.392 |
| Nonanal                       | 0.332  | 0.058 | 0.241  | 0.464 | 0.000  | 0.329  | 0.272  | 0.333 | 0.396 | 0.604 |
| 2-Nonanone                    | 0.000  | 0.000 | 0.000  | 0.000 | 0.172  | 0.148  | 0.000  | 0.000 | 0.000 | 0.529 |
| Cyclohexanecarboxylic acid et | 0.000  | 0.000 | 0.000  | 0.525 | 0.000  | 0.000  | 0.020  | 0.000 | 0.000 | 0.000 |
| Perillene                     | 0.000  | 0.045 | 0.363  | 0.000 | 0.114  | 0.693  | 0.088  | 0.038 | 0.026 | 0.083 |
| Pentanoic_acid_pentyl ester   | 0.146  | 0.000 | 0.000  | 0.000 | 0.000  | 0.000  | 0.000  | 0.000 | 0.000 | 0.000 |
| Hexanoic_acid_butyl ester     | 0.000  | 0.000 | 0.826  | 0.107 | 0.000  | 0.000  | 0.000  | 0.000 | 0.000 | 0.000 |
| Butanoic_acid_hexyl ester     | 0.042  | 0.000 | 0.386  | 0.084 | 0.000  | 0.000  | 0.000  | 0.000 | 0.000 | 0.032 |
| Tetradecane                   | 0.889  | 0.662 | 0.141  | 0.084 | 0.779  | 0.878  | 0.000  | 0.661 | 0.877 | 0.127 |
| Octanoic_acid_ethyl ester     | 0.000  | 0.000 | 0.000  | 0.000 | 0.000  | 0.000  | 0.000  | 0.000 | 0.000 | 0.000 |
| Acetic_acid                   | 11.532 | 1.336 | 23.532 | 8.546 | 2.523  | 2.211  | 1.351  | 2.086 | 4.993 | 2.073 |
| (+)-2-Bornanone               | 0.000  | 0.000 | 0.000  | 0.000 | 0.000  | 0.000  | 0.000  | 0.000 | 0.000 | 0.000 |
| 2-Decanone                    | 0.000  | 0.000 | 0.000  | 0.000 | 0.032  | 0.037  | 0.003  | 0.004 | 0.000 | 0.017 |
| Benzaldehyde                  | 0.957  | 3.272 | 0.755  | 1.278 | 2.198  | 3.887  | 1.099  | 1.042 | 0.915 | 1.622 |
| 1-Hexanol_2-ethyl-            | 0.000  | 0.138 | 0.000  | 0.000 | 0.000  | 0.000  | 0.000  | 0.064 | 0.000 | 0.000 |
| 2-Nonenal_(E)-                | 0.112  | 0.007 | 0.156  | 0.117 | 0.000  | 0.060  | 0.212  | 0.105 | 0.078 | 0.095 |
| Pentadecane                   | 0.000  | 0.815 | 0.000  | 0.000 | 0.000  | 0.760  | 0.000  | 0.000 | 0.000 | 0.000 |
| Propanoic_acid                | 9.552  | 1.158 | 8.681  | 5.844 | 2.030  | 0.565  | 0.956  | 1.233 | 4.163 | 1.307 |
| Caparratriene                 | 0.000  | 0.942 | 0.000  | 0.000 | 0.395  | 0.415  | 0.055  | 0.089 | 0.000 | 0.000 |
| 1-Pentadecene                 | 0.238  | 0.599 | 0.100  | 0.077 | 1.843  | 1.321  | 0.000  | 0.021 | 2.297 | 0.010 |
| Linalool                      | 0.000  | 0.000 | 0.185  | 0.505 | 0.000  | 0.000  | 0.256  | 0.466 | 0.000 | 1.403 |
| Propanoic_acid_2-methyl-      | 4.348  | 1.134 | 1.835  | 1.907 | 0.000  | 0.000  | 0.229  | 0.361 | 3.995 | 0.818 |
| Caryophyllene                 | 0.509  | 0.000 | 0.037  | 0.262 | 10.602 | 0.409  | 13.265 | 2.571 | 2.572 | 0.282 |
| Methyl_carvacrol              | 0.000  | 0.000 | 0.000  | 0.000 | 0.000  | 0.000  | 0.000  | 0.000 | 0.000 | 0.467 |
| Dichloroacetic_acid_4-pentade | 0.000  | 0.000 | 0.000  | 0.000 | 0.000  | 0.000  | 0.000  | 0.000 | 0.613 | 0.000 |
| 2-Undecanone                  | 0.545  | 1.269 | 0.182  | 0.494 | 1.561  | 3.373  | 0.733  | 0.905 | 0.551 | 0.000 |
| 159-Decatriene_2358-tetr      | 0.000  | 0.521 | 0.000  | 0.000 | 0.583  | 0.929  | 0.000  | 0.000 | 0.283 | 0.000 |
| Benzeneacetaldehyde           | 0.000  | 0.000 | 0.000  | 0.000 | 0.000  | 0.000  | 0.000  | 0.000 | 0.000 | 0.000 |

|                               |        |        |        |        |         |        |        |        |        |        |
|-------------------------------|--------|--------|--------|--------|---------|--------|--------|--------|--------|--------|
| Butanoic_acid                 | 39.256 | 6.374  | 73.989 | 35.601 | 5.162   | 2.267  | 3.079  | 3.375  | 10.900 | 10.989 |
| Hexadecane                    | 2.475  | 3.880  | 0.386  | 0.286  | 0.566   | 0.384  | 0.000  | 0.106  | 0.482  | 0.148  |
| Levomenthol                   | 0.000  | 0.163  | 0.000  | 0.000  | 0.000   | 0.322  | 0.357  | 0.000  | 0.000  | 0.808  |
| Hexanoic_acid_2-methyl-       | 22.643 | 10.008 | 8.853  | 10.439 | 6.142   | 5.901  | 1.264  | 1.727  | 13.713 | 5.455  |
| Cetene                        | 0.081  | 0.219  | 0.370  | 0.000  | 0.660   | 0.337  | 0.000  | 0.000  | 0.281  | 0.000  |
| Valencene                     | 1.623  | 0.769  | 7.124  | 0.000  | 1.281   | 0.607  | 1.122  | 0.095  | 1.978  | 0.000  |
| a-Muurolene                   | 0.411  | 0.000  | 0.000  | 0.000  | 0.350   | 0.000  | 0.000  | 0.000  | 0.000  | 0.000  |
| b-Bisabolene                  | 0.000  | 0.000  | 0.082  | 0.000  | 0.138   | 0.044  | 0.158  | 0.000  | 2.900  | 0.024  |
| Nonadecane                    | 0.000  | 1.408  | 0.000  | 0.000  | 0.000   | 0.000  | 0.000  | 0.000  | 0.000  | 0.000  |
| Pentanoic_acid                | 0.087  | 4.873  | 20.424 | 16.074 | 2.743   | 2.255  | 1.340  | 1.563  | 6.958  | 4.782  |
| g-Cadinene                    | 0.000  | 0.000  | 0.000  | 0.000  | 0.734   | 0.000  | 0.194  | 0.175  | 0.000  | 0.000  |
| trans-g-Bisabolene            | 0.293  | 0.000  | 0.000  | 0.857  | 0.781   | 0.569  | 0.755  | 0.000  | 3.599  | 0.000  |
| trans-a-Bisabolene            | 0.000  | 0.000  | 0.000  | 0.000  | 0.000   | 0.000  | 0.000  | 0.000  | 0.343  | 0.000  |
| Aromandendrene                | 0.000  | 0.000  | 0.081  | 0.215  | 0.000   | 0.000  | 0.070  | 0.000  | 0.000  | 0.000  |
| Pentanoic_acid_4-methyl-      | 0.362  | 0.000  | 0.905  | 0.542  | 0.007   | 0.043  | 0.050  | 0.047  | 0.072  | 0.184  |
| Germacrene_B                  | 0.000  | 0.000  | 0.000  | 0.000  | 0.147   | 0.000  | 0.000  | 0.000  | 0.000  | 0.000  |
| Anethole                      | 1.909  | 0.715  | 0.000  | 0.126  | 0.109   | 0.857  | 0.193  | 0.159  | 21.056 | 0.056  |
| 2-Tridecanone                 | 0.332  | 0.695  | 0.373  | 0.297  | 0.447   | 0.738  | 0.216  | 0.363  | 0.000  | 0.132  |
| Octadecane                    | 1.011  | 4.935  | 0.000  | 0.000  | 0.022   | 0.000  | 0.000  | 0.000  | 0.040  | 0.000  |
| Hexanoic_acid                 | 4.859  | 0.000  | 62.256 | 37.512 | 4.204   | 1.798  | 0.583  | 0.384  | 6.151  | 26.975 |
| 59-Undecadien-2-one 610-dim   | 0.065  | 0.000  | 0.641  | 0.512  | 0.237   | 0.947  | 0.248  | 0.125  | 0.237  | 0.329  |
| 2-Tetradecanone               | 0.277  | 0.254  | 0.000  | 0.158  | 0.180   | 0.000  | 0.053  | 0.061  | 0.220  | 0.113  |
| Phenylethyl_Alcohol           | 0.852  | 0.254  | 0.697  | 0.701  | 0.000   | 0.000  | 0.000  | 0.000  | 0.897  | 0.439  |
| 2-Tetradecanone               | 0.279  | 0.360  | 0.000  | 0.000  | 0.239   | 0.108  | 0.000  | 0.000  | 0.045  | 0.000  |
| Heptanoic_acid                | 0.000  | 0.000  | 8.713  | 10.681 | 2.996   | 0.645  | 0.136  | 0.169  | 3.091  | 6.149  |
| Phenol                        | 2.246  | 1.196  | 3.701  | 2.047  | 0.105   | 0.140  | 4.212  | 1.550  | 0.108  | 0.146  |
| 2-Pentadecanone               | 0.463  | 1.910  | 0.388  | 0.335  | 0.964   | 0.975  | 0.158  | 0.139  | 0.311  | 0.101  |
| 3-Phenylpropanol              | 0.396  | 0.000  | 0.346  | 0.457  | 0.000   | 0.000  | 0.000  | 0.000  | 0.000  | 0.135  |
| Octanoic_acid                 | 0.185  | 0.000  | 2.403  | 2.764  | 0.252   | 0.906  | 0.122  | 0.192  | 0.520  | 2.080  |
| Phenol_2-methyl-              | 53.746 | 89.820 | 39.749 | 49.591 | 100.830 | 66.807 | 44.949 | 38.012 | 82.591 | 38.855 |
| 2-Hexadecanone                | 0.368  | 1.154  | 0.000  | 0.000  | 0.283   | 0.178  | 0.000  | 0.000  | 0.000  | 0.000  |
| 2-Piperidinone                | 0.000  | 0.000  | 0.000  | 0.000  | 0.000   | 0.000  | 0.000  | 0.000  | 0.000  | 0.000  |
| 2-Tridecanol                  | 0.257  | 1.123  | 0.275  | 0.176  | 0.253   | 0.000  | 0.000  | 0.000  | 0.772  | 0.000  |
| Nonanoic_acid                 | 0.475  | 0.800  | 2.926  | 7.390  | 9.147   | 8.303  | 6.488  | 7.523  | 2.851  | 6.692  |
| Carvacrol                     | 0.000  | 0.000  | 0.000  | 0.000  | 0.000   | 0.000  | 0.000  | 0.000  | 0.000  | 0.562  |
| Ethanone_1-(2-aminophenyl)-   | 0.000  | 0.000  | 0.000  | 0.000  | 0.724   | 0.599  | 0.045  | 0.121  | 0.000  | 0.000  |
| 1H-Pyrrole-2,5-dione_3-ethyl- | 0.293  | 0.926  | 0.111  | 0.160  | 0.153   | 0.316  | 0.569  | 0.302  | 0.202  | 0.073  |
| 1-Tetracosene                 | 0.076  | 1.481  | 0.172  | 0.097  | 0.210   | 0.061  | 0.000  | 0.000  | 0.482  | 0.028  |
| n-Decanoic_acid               | 0.315  | 0.109  | 0.498  | 0.833  | 0.325   | 0.604  | 0.096  | 0.000  | 0.482  | 0.314  |
| 1-Hexadecanol                 | 1.972  | 5.940  | 6.229  | 2.950  | 0.824   | 0.542  | 0.004  | 0.000  | 2.246  | 0.543  |
| (Z)6-Pentadecen-1-ol          | 0.209  | 0.318  | 0.448  | 0.178  | 0.000   | 0.000  | 0.448  | 0.000  | 0.175  | 0.040  |
| g-Dodecalactone               | 0.465  | 0.374  | 0.473  | 0.453  | 0.269   | 0.889  | 0.552  | 0.393  | 0.221  | 0.104  |
| Indole                        | 15.395 | 18.224 | 5.476  | 2.388  | 21.637  | 10.690 | 18.943 | 22.614 | 22.141 | 7.089  |
| 1H-Indole_5-methyl-           | 0.500  | 0.000  | 6.407  | 5.411  | 0.000   | 29.426 | 1.682  | 6.832  | 22.853 | 0.000  |
| Benzeneacetic_acid            | 0.245  | 0.144  | 0.370  | 0.514  | 0.095   | 0.205  | 0.089  | 0.134  | 0.000  | 0.181  |
| Benzenepropanoic_acid silver( | 0.587  | 0.219  | 2.689  | 1.680  | 0.000   | 0.171  | 0.363  | 0.094  | 0.395  | 0.345  |

|                              |                      |                      |                      |                      |                      |                      |                      |                      |                |                |
|------------------------------|----------------------|----------------------|----------------------|----------------------|----------------------|----------------------|----------------------|----------------------|----------------|----------------|
| 2H-Indol-2-one_13-dihydro-   | 0.143                | 0.315                | 0.092                | 0.160                | 0.240                | 0.164                | 0.057                | 0.062                | 0.101          | 0.055          |
| <b>sample_id</b>             | <b>20029_1</b>       | <b>20029_2</b>       | <b>20030_1</b>       | <b>20030_2</b>       | <b>20038_1</b>       | <b>20038_2</b>       | <b>20043_1</b>       | <b>20043_2</b>       | <b>20052_1</b> | <b>20052_2</b> |
| <b>group</b>                 | <b>LGI MD-ATFI S</b> | <b>ATFI S</b>  | <b>ATFI S</b>  |
| Methyl_acetate               | 0.000                | 0.000                | 0.000                | 0.000                | 0.000                | 0.000                | 0.000                | 0.000                | 0.000          | 0.000          |
| Ethyl_Acetate                | 0.000                | 0.000                | 0.000                | 0.000                | 0.000                | 0.000                | 0.000                | 0.000                | 0.000          | 0.000          |
| 2-Butanone                   | 0.034                | 0.171                | 0.063                | 0.054                | 0.020                | 0.045                | 0.067                | 0.044                | 0.000          | 0.101          |
| Butanal_3-methyl-            | 0.867                | 1.562                | 1.602                | 2.869                | 1.524                | 2.794                | 2.613                | 3.212                | 3.179          | 0.637          |
| Ethanol                      | 0.069                | 0.072                | 0.000                | 0.000                | 0.000                | 0.000                | 0.139                | 0.064                | 0.000          | 0.032          |
| Propanoic_acid_ethyl ester   | 0.000                | 0.000                | 0.000                | 0.000                | 0.000                | 0.000                | 0.000                | 0.000                | 0.000          | 0.000          |
| 2-Pentanone                  | 0.000                | 0.358                | 0.000                | 0.000                | 0.000                | 0.305                | 0.269                | 0.205                | 0.444          | 1.158          |
| Butanoic_acid_methyl ester   | 0.000                | 0.000                | 0.000                | 0.000                | 0.000                | 0.000                | 0.000                | 0.000                | 0.000          | 0.000          |
| Methyl_Isobutyl_Ketone       | 0.076                | 0.151                | 0.274                | 0.261                | 0.068                | 0.050                | 0.088                | 0.068                | 0.145          | 0.233          |
| a-Pinene                     | 0.000                | 0.000                | 0.127                | 0.037                | 0.048                | 0.157                | 0.129                | 0.167                | 0.000          | 0.000          |
| Disulfide_dimethyl           | 0.315                | 0.000                | 1.724                | 0.800                | 0.450                | 0.507                | 0.500                | 0.249                | 0.778          | 0.402          |
| Butanoic_acid_3-methyl_ethyl | 0.000                | 0.000                | 0.000                | 0.000                | 0.000                | 0.000                | 0.042                | 0.008                | 0.000          | 0.000          |
| Methyl_valerate              | 0.000                | 0.000                | 0.000                | 0.000                | 0.000                | 0.000                | 0.000                | 0.000                | 0.000          | 0.000          |
| b-Pinene                     | 0.000                | 0.000                | 0.709                | 0.000                | 0.000                | 0.096                | 0.213                | 0.000                | 0.000          | 0.000          |
| Butanoic_acid_propyl ester   | 0.000                | 0.000                | 0.000                | 0.000                | 0.000                | 0.000                | 0.000                | 0.000                | 0.000          | 0.000          |
| 3-Carene                     | 0.000                | 0.000                | 0.000                | 0.000                | 0.000                | 0.730                | 0.000                | 0.181                | 0.000          | 0.000          |
| Pentanoic_acid_ethyl ester   | 0.000                | 0.000                | 0.000                | 0.000                | 0.000                | 0.000                | 0.000                | 0.000                | 0.000          | 0.000          |
| (2E4E)-37-Dimethylocta-24-d  | 0.215                | 0.462                | 0.000                | 0.000                | 0.000                | 0.000                | 0.000                | 0.000                | 0.170          | 0.117          |
| a-Phellandrene               | 0.000                | 0.000                | 0.385                | 0.000                | 0.000                | 0.034                | 0.000                | 0.000                | 0.000          | 0.000          |
| b-Myrcene                    | 0.000                | 0.000                | 0.000                | 0.173                | 0.000                | 0.134                | 0.000                | 0.000                | 0.000          | 0.000          |
| Isovaleric_acid_propyl ester | 0.000                | 0.000                | 0.000                | 0.000                | 0.000                | 0.000                | 0.000                | 0.000                | 0.000          | 0.000          |
| Terpinolene                  | 0.000                | 0.000                | 0.097                | 0.447                | 0.000                | 0.130                | 0.000                | 0.000                | 0.000          | 0.000          |
| 1-Butanol                    | 0.000                | 0.000                | 0.000                | 0.000                | 0.000                | 0.000                | 0.000                | 0.146                | 0.000          | 0.173          |
| D-Limonene                   | 0.629                | 0.317                | 0.929                | 0.252                | 0.308                | 2.791                | 2.578                | 0.285                | 3.200          | 0.244          |
| beta-Phellandrene            | 0.000                | 0.000                | 0.000                | 0.000                | 0.000                | 0.000                | 0.000                | 0.000                | 0.000          | 0.000          |
| Butanoic_acid_butyl ester    | 0.000                | 0.028                | 0.037                | 0.000                | 0.000                | 0.000                | 0.000                | 0.000                | 0.000          | 0.000          |
| Pentanoic_acid_propyl ester  | 0.000                | 0.000                | 0.000                | 0.000                | 0.000                | 0.000                | 0.000                | 0.000                | 0.000          | 0.000          |
| g-Terpinene                  | 0.000                | 0.000                | 1.452                | 0.016                | 0.034                | 1.184                | 0.189                | 0.307                | 0.000          | 0.051          |
| Hexanoic_acid_ethyl ester    | 0.022                | 0.082                | 0.000                | 0.000                | 0.026                | 0.000                | 0.000                | 0.000                | 0.000          | 0.028          |
| 1-Butanol_3-methyl-          | 0.136                | 0.128                | 0.176                | 0.218                | 0.071                | 0.000                | 0.182                | 0.347                | 0.000          | 0.062          |
| b-Ocimene                    | 0.000                | 0.000                | 0.111                | 0.000                | 0.000                | 0.003                | 0.000                | 0.000                | 0.000          | 0.000          |
| Styrene                      | 0.000                | 0.000                | 0.000                | 0.000                | 0.000                | 0.000                | 0.000                | 0.068                | 0.000          | 0.000          |
| p-Cymene                     | 0.000                | 0.000                | 0.376                | 0.238                | 0.000                | 0.774                | 0.078                | 0.220                | 0.000          | 0.000          |
| 2-Heptanone_5-methyl-        | 0.064                | 0.000                | 0.000                | 0.000                | 0.069                | 0.000                | 0.000                | 0.000                | 0.055          | 0.109          |
| 2-Carene                     | 0.000                | 0.000                | 0.149                | 0.000                | 0.000                | 0.000                | 0.080                | 0.000                | 0.000          | 0.052          |
| 1-Pentanol                   | 0.111                | 0.000                | 0.111                | 0.058                | 0.000                | 0.000                | 0.077                | 0.151                | 0.000          | 0.061          |

|                               |       |        |       |       |       |       |       |       |       |       |
|-------------------------------|-------|--------|-------|-------|-------|-------|-------|-------|-------|-------|
| Acetic_acid_hexyl_ester       | 0.000 | 0.000  | 0.000 | 0.000 | 0.000 | 0.000 | 0.000 | 0.000 | 0.000 | 0.000 |
| Pentanoic_acid_4-methyl- pen  | 0.000 | 0.000  | 0.000 | 0.000 | 0.000 | 0.000 | 0.000 | 0.000 | 0.000 | 0.000 |
| Octanal                       | 0.000 | 0.000  | 0.000 | 0.000 | 0.000 | 0.000 | 0.000 | 0.000 | 0.000 | 0.000 |
| 2-Octanone                    | 0.069 | 0.164  | 0.137 | 0.125 | 0.242 | 0.000 | 0.163 | 0.202 | 0.268 | 0.135 |
| Acetoin                       | 0.368 | 0.000  | 0.000 | 0.000 | 0.000 | 0.249 | 0.000 | 0.139 | 0.000 | 4.522 |
| Pentanoic_acid_butyl ester    | 0.000 | 0.000  | 0.096 | 0.000 | 0.000 | 0.000 | 0.000 | 0.000 | 0.000 | 0.000 |
| Butanoic_acid_pentyl ester    | 0.000 | 0.000  | 0.000 | 0.000 | 0.000 | 0.000 | 0.000 | 0.000 | 0.000 | 0.000 |
| Hexanoic_acid_propyl ester    | 0.000 | 0.000  | 0.059 | 0.000 | 0.000 | 0.000 | 0.000 | 0.000 | 0.000 | 0.022 |
| Tridecane                     | 0.031 | 0.000  | 0.004 | 0.011 | 0.048 | 0.000 | 0.335 | 0.003 | 0.000 | 0.000 |
| 5-Hepten-2-one_6-methyl-      | 7.703 | 2.123  | 9.610 | 4.272 | 3.806 | 3.883 | 4.295 | 5.775 | 2.952 | 0.766 |
| Heptanoic_acid_ethyl ester    | 0.000 | 0.000  | 0.000 | 0.000 | 0.000 | 0.000 | 0.000 | 0.000 | 0.000 | 0.000 |
| Dimethyl_trisulfide           | 0.176 | 0.000  | 0.948 | 0.258 | 0.291 | 0.224 | 0.133 | 0.000 | 0.269 | 0.145 |
| Allyl_Isothiocyanate          | 0.000 | 0.000  | 0.000 | 0.000 | 0.000 | 0.000 | 0.000 | 0.000 | 0.000 | 0.000 |
| 2-Hydroxy-3-pentanone         | 0.019 | 0.000  | 0.000 | 0.000 | 0.000 | 0.000 | 0.000 | 0.042 | 0.102 | 0.000 |
| Hexanoic_acid_isobutyl ester  | 0.000 | 0.000  | 0.036 | 0.000 | 0.008 | 0.000 | 0.000 | 0.000 | 0.000 | 0.000 |
| 2-butyl-1-octanol             | 0.022 | 0.074  | 0.001 | 0.043 | 0.000 | 0.074 | 0.000 | 0.000 | 0.039 | 0.000 |
| Cyclohexanecarboxylic acid me | 0.020 | 0.000  | 0.000 | 0.000 | 0.047 | 0.000 | 0.000 | 0.000 | 0.000 | 0.033 |
| 1-Hexanol                     | 0.141 | 0.000  | 0.255 | 0.078 | 0.151 | 0.000 | 0.136 | 0.500 | 0.143 | 0.435 |
| Nonanal                       | 0.124 | 0.855  | 0.494 | 0.283 | 0.352 | 0.192 | 0.280 | 0.201 | 0.406 | 0.368 |
| 2-Nonanone                    | 0.037 | 0.000  | 0.000 | 0.000 | 0.000 | 0.000 | 0.000 | 0.112 | 0.000 | 0.171 |
| Cyclohexanecarboxylic acid et | 0.000 | 0.000  | 0.000 | 0.000 | 0.062 | 0.000 | 0.000 | 0.000 | 0.000 | 0.000 |
| Perillene                     | 0.114 | 0.028  | 0.055 | 0.000 | 0.099 | 0.048 | 0.000 | 0.000 | 0.045 | 0.000 |
| Pentanoic_acid_pentyl ester   | 0.000 | 0.000  | 0.000 | 0.000 | 0.000 | 0.000 | 0.000 | 0.000 | 0.000 | 0.000 |
| Hexanoic_acid_butyl ester     | 0.000 | 0.000  | 0.184 | 0.000 | 0.000 | 0.000 | 0.000 | 0.000 | 0.000 | 0.000 |
| Butanoic_acid_hexyl ester     | 0.000 | 0.000  | 0.060 | 0.000 | 0.000 | 0.000 | 0.000 | 0.000 | 0.000 | 0.029 |
| Tetradecane                   | 0.356 | 0.243  | 0.515 | 0.514 | 0.332 | 0.596 | 0.152 | 0.000 | 0.419 | 0.000 |
| Octanoic_acid_ethyl ester     | 0.000 | 0.000  | 0.000 | 0.000 | 0.000 | 0.000 | 0.000 | 0.000 | 0.000 | 0.000 |
| Acetic_acid                   | 5.513 | 11.692 | 3.505 | 1.434 | 7.096 | 1.210 | 5.073 | 3.637 | 1.962 | 4.021 |
| (+)-2-Bornanone               | 0.000 | 0.000  | 0.000 | 0.000 | 0.000 | 0.000 | 0.000 | 0.000 | 0.000 | 0.000 |
| 2-Decanone                    | 0.004 | 0.000  | 0.000 | 0.000 | 0.000 | 0.000 | 0.043 | 0.000 | 0.000 | 0.000 |
| Benzaldehyde                  | 1.564 | 1.600  | 1.162 | 1.803 | 0.993 | 2.496 | 0.977 | 2.244 | 1.665 | 0.484 |
| 1-Hexanol_2-ethyl-            | 0.000 | 0.000  | 0.207 | 0.000 | 0.000 | 0.000 | 0.000 | 0.184 | 0.000 | 0.000 |
| 2-Nonenal_(E)-                | 0.068 | 0.211  | 0.107 | 0.001 | 0.060 | 0.060 | 0.062 | 0.056 | 0.000 | 0.085 |
| Pentadecane                   | 0.000 | 0.000  | 0.000 | 0.000 | 0.000 | 0.000 | 0.000 | 0.000 | 0.524 | 0.000 |
| Propanoic_acid                | 4.995 | 9.411  | 2.801 | 1.385 | 3.595 | 1.368 | 4.465 | 2.493 | 0.583 | 2.213 |
| Caparratriene                 | 0.455 | 0.000  | 0.000 | 0.000 | 0.000 | 0.000 | 1.419 | 0.000 | 0.000 | 0.000 |
| 1-Pentadecene                 | 0.177 | 0.524  | 0.186 | 0.443 | 0.510 | 0.295 | 1.236 | 0.000 | 0.475 | 0.244 |
| Linalool                      | 0.000 | 0.000  | 0.966 | 1.103 | 0.000 | 0.000 | 0.000 | 0.298 | 0.000 | 0.000 |
| Propanoic_acid_2-methyl-      | 1.549 | 5.860  | 1.661 | 0.831 | 1.794 | 1.116 | 2.312 | 1.093 | 0.209 | 0.887 |



|                               |        |        |        |        |        |        |        |        |        |        |
|-------------------------------|--------|--------|--------|--------|--------|--------|--------|--------|--------|--------|
| Caryophyllene                 | 0.032  | 0.214  | 2.441  | 1.266  | 1.621  | 0.673  | 1.781  | 1.216  | 6.085  | 0.702  |
| Methyl_carvacrol              | 0.000  | 0.000  | 0.000  | 2.151  | 0.000  | 0.787  | 0.000  | 0.012  | 0.000  | 0.000  |
| Dichloroacetic_acid_4-pentade | 0.142  | 0.084  | 0.000  | 0.000  | 0.422  | 0.000  | 0.387  | 0.000  | 0.000  | 0.000  |
| 2-Undecanone                  | 0.501  | 0.208  | 0.286  | 0.329  | 0.000  | 0.351  | 0.739  | 0.994  | 0.986  | 0.644  |
| 159-Decatriene 2358-tetr      | 0.000  | 0.000  | 0.000  | 0.000  | 0.000  | 0.000  | 0.526  | 0.807  | 0.000  | 0.000  |
| Benzeneacetaldehyde           | 0.000  | 0.000  | 0.368  | 0.997  | 0.000  | 0.000  | 0.000  | 0.000  | 0.693  | 0.099  |
| Butanoic_acid                 | 12.239 | 33.255 | 9.993  | 3.177  | 19.294 | 7.588  | 6.872  | 6.819  | 2.987  | 12.880 |
| Hexadecane                    | 0.331  | 0.000  | 0.276  | 0.272  | 0.172  | 0.272  | 0.471  | 0.448  | 0.362  | 0.231  |
| Levomenthol                   | 0.070  | 0.988  | 0.000  | 0.000  | 0.000  | 0.000  | 0.000  | 0.000  | 0.000  | 0.925  |
| Hexanoic_acid_2-methyl-       | 6.684  | 27.506 | 7.572  | 4.516  | 7.324  | 6.161  | 7.577  | 4.426  | 2.292  | 4.323  |
| Cetene                        | 0.160  | 0.088  | 0.206  | 0.352  | 0.173  | 0.154  | 0.419  | 0.294  | 0.104  | 0.130  |
| Valencene                     | 0.000  | 0.000  | 0.338  | 0.934  | 0.358  | 0.000  | 0.623  | 0.000  | 0.193  | 0.209  |
| a-Muurolene                   | 0.000  | 0.000  | 0.000  | 0.000  | 0.000  | 0.000  | 0.000  | 0.000  | 0.000  | 0.000  |
| b-Bisabolene                  | 0.000  | 0.000  | 0.501  | 0.707  | 0.000  | 0.194  | 0.197  | 0.500  | 0.393  | 0.000  |
| Nonadecane                    | 0.000  | 0.000  | 0.000  | 0.000  | 0.000  | 0.000  | 0.000  | 0.000  | 0.000  | 0.000  |
| Pentanoic_acid                | 9.108  | 18.704 | 5.191  | 2.435  | 11.730 | 5.966  | 4.642  | 5.048  | 1.934  | 7.590  |
| g-Cadinene                    | 0.000  | 0.000  | 0.000  | 0.533  | 0.000  | 0.120  | 0.000  | 0.000  | 0.583  | 0.000  |
| trans-g-Bisabolene            | 0.000  | 0.000  | 1.000  | 0.424  | 0.255  | 0.000  | 1.934  | 7.721  | 0.386  | 0.316  |
| trans-a-Bisabolene            | 0.000  | 0.000  | 0.093  | 0.055  | 0.000  | 0.000  | 0.000  | 0.000  | 0.174  | 0.000  |
| Aromandendrene                | 0.058  | 0.000  | 0.000  | 0.000  | 0.000  | 0.000  | 0.000  | 0.000  | 0.000  | 0.000  |
| Pentanoic_acid_4-methyl-      | 0.413  | 0.094  | 0.060  | 0.000  | 0.435  | 0.173  | 0.090  | 0.109  | 0.000  | 0.000  |
| Germacrene_B                  | 0.000  | 0.000  | 0.000  | 0.000  | 0.000  | 0.000  | 0.000  | 0.000  | 0.000  | 0.000  |
| Anethole                      | 0.946  | 0.117  | 2.128  | 0.332  | 0.470  | 0.420  | 0.116  | 0.073  | 0.131  | 0.466  |
| 2-Tridecanone                 | 0.309  | 0.126  | 0.000  | 0.399  | 0.000  | 0.220  | 0.410  | 0.397  | 0.365  | 0.452  |
| Octadecane                    | 0.000  | 0.000  | 0.235  | 0.273  | 0.000  | 0.000  | 0.000  | 2.360  | 0.000  | 0.000  |
| Hexanoic_acid                 | 9.608  | 16.745 | 13.306 | 6.712  | 31.129 | 13.297 | 4.829  | 14.429 | 4.382  | 38.006 |
| 59-Undecadien-2-one 610-dim   | 0.217  | 0.233  | 0.351  | 0.576  | 0.412  | 0.291  | 0.336  | 0.239  | 0.959  | 0.321  |
| 2-Tetradecanone               | 0.219  | 0.000  | 0.000  | 0.302  | 0.000  | 0.214  | 0.178  | 0.000  | 0.000  | 0.000  |
| Phenylethyl_Alcohol           | 0.485  | 0.401  | 0.453  | 0.420  | 0.000  | 0.000  | 0.000  | 0.000  | 0.437  | 0.488  |
| 2-Tetradecanone               | 0.200  | 0.000  | 0.051  | 0.084  | 0.000  | 0.000  | 0.089  | 0.124  | 0.051  | 0.077  |
| Heptanoic_acid                | 4.676  | 4.998  | 4.835  | 2.707  | 19.376 | 7.490  | 2.871  | 7.918  | 1.911  | 15.721 |
| Phenol                        | 0.650  | 0.231  | 0.183  | 0.597  | 0.996  | 0.748  | 0.212  | 0.210  | 0.377  | 3.340  |
| 2-Pentadecanone               | 0.377  | 0.229  | 0.288  | 0.601  | 0.156  | 0.239  | 0.326  | 0.288  | 0.292  | 0.202  |
| 3-Phenylpropanol              | 0.106  | 0.000  | 0.111  | 0.101  | 0.000  | 0.000  | 0.000  | 0.000  | 0.036  | 0.160  |
| Octanoic_acid                 | 0.597  | 0.656  | 1.667  | 0.780  | 8.935  | 2.204  | 0.429  | 2.213  | 0.613  | 5.120  |
| Phenol_2-methyl-              | 47.088 | 96.946 | 57.084 | 46.595 | 51.445 | 67.567 | 74.549 | 56.422 | 53.452 | 38.830 |
| 2-Hexadecanone                | 0.159  | 0.000  | 0.000  | 0.274  | 0.000  | 0.000  | 0.000  | 0.000  | 0.000  | 0.000  |
| 2-Piperidinone                | 0.000  | 0.000  | 0.000  | 0.000  | 0.000  | 0.000  | 0.000  | 0.000  | 0.171  | 0.326  |
| 2-Tridecanol                  | 0.260  | 0.000  | 0.580  | 0.705  | 0.000  | 0.000  | 0.000  | 0.000  | 0.000  | 0.258  |
| Nonanoic_acid                 | 2.340  | 0.884  | 4.104  | 1.911  | 3.139  | 5.076  | 2.259  | 1.708  | 7.376  | 1.881  |
| Carvacrol                     | 0.000  | 0.000  | 0.201  | 2.390  | 0.000  | 0.616  | 0.000  | 0.000  | 0.000  | 0.000  |
| Ethanone_1-(2-aminophenyl)-   | 0.000  | 1.087  | 0.000  | 0.000  | 0.000  | 0.141  | 0.422  | 0.079  | 0.000  | 0.000  |
| 1H-Pyrrole-25-dione 3-ethyl-  | 0.137  | 0.209  | 0.220  | 0.295  | 0.122  | 0.290  | 0.300  | 0.343  | 0.302  | 0.191  |
| 1-Tetracosene                 | 0.089  | 0.000  | 0.286  | 0.549  | 0.000  | 0.000  | 0.000  | 0.000  | 0.057  | 0.102  |
| n-Decanoic_acid               | 0.323  | 0.176  | 0.080  | 0.000  | 0.227  | 0.314  | 0.000  | 0.000  | 0.069  | 0.320  |

|                               |         |         |         |         |         |         |         |         |         |         |
|-------------------------------|---------|---------|---------|---------|---------|---------|---------|---------|---------|---------|
| 1-Hexadecanol                 | 1.938   | 0.571   | 4.573   | 9.095   | 0.720   | 1.277   | 0.504   | 0.000   | 0.642   | 2.467   |
| (Z)6-Pentadecen-1-ol          | 0.243   | 0.000   | 0.239   | 0.230   | 0.000   | 0.000   | 0.000   | 0.000   | 0.153   | 0.376   |
| g-Dodecalactone               | 0.146   | 0.936   | 1.347   | 0.823   | 0.477   | 0.953   | 0.920   | 0.786   | 0.152   | 0.347   |
| Indole                        | 8.815   | 9.731   | 11.107  | 10.175  | 5.958   | 5.706   | 17.364  | 8.302   | 20.864  | 8.119   |
| 1H-Indole_5-methyl-           | 27.987  | 23.896  | 26.118  | 23.388  | 19.170  | 24.772  | 10.305  | 7.165   | 15.437  | 13.504  |
| Benzeneacetic_acid            | 0.152   | 1.148   | 0.000   | 0.000   | 0.000   | 0.000   | 0.000   | 0.000   | 0.115   | 0.000   |
| Benzenepropanoic_acid silver( | 0.394   | 0.878   | 0.000   | 0.000   | 0.471   | 0.145   | 0.077   | 0.000   | 0.194   | 0.391   |
| 2H-Indol-2-one_13-dihydro-    | 0.115   | 0.428   | 0.138   | 0.118   | 0.140   | 0.206   | 0.213   | 0.106   | 0.121   | 0.067   |
| sample_id                     | 20059_1 | 20059_2 | 20074_1 | 20074_2 | 20081_1 | 20081_2 | 20085_1 | 20085_2 | 20089_1 | 20089_2 |
| group                         | ATFI_S  |
| Methyl_acetate                | 0.000   | 0.000   | 0.000   | 0.000   | 0.000   | 0.000   | 0.000   | 0.000   | 0.000   | 0.000   |
| Ethyl_Acetate                 | 0.230   | 0.000   | 0.000   | 0.000   | 0.000   | 0.000   | 0.000   | 0.000   | 0.000   | 0.000   |
| 2-Butanone                    | 0.018   | 0.206   | 0.574   | 0.199   | 0.098   | 0.107   | 0.009   | 0.059   | 0.039   | 0.102   |
| Butanal_3-methyl-             | 0.405   | 2.060   | 1.322   | 1.033   | 0.607   | 1.263   | 2.272   | 0.964   | 1.878   | 6.538   |
| Ethanol                       | 0.300   | 0.000   | 0.107   | 0.089   | 0.132   | 0.194   | 0.021   | 0.578   | 0.042   | 0.232   |
| Propanoic_acid_ethyl ester    | 0.798   | 0.000   | 0.000   | 0.000   | 0.159   | 0.000   | 0.000   | 0.000   | 0.000   | 0.000   |
| 2-Pentanone                   | 0.000   | 0.242   | 0.861   | 0.000   | 0.300   | 0.000   | 0.000   | 0.508   | 0.000   | 0.000   |
| Butanoic_acid_methyl ester    | 0.889   | 0.000   | 0.727   | 0.295   | 0.364   | 0.242   | 0.000   | 0.000   | 0.000   | 0.000   |
| Methyl_Isobutyl_Ketone        | 0.140   | 0.159   | 0.466   | 0.443   | 0.369   | 0.278   | 0.097   | 0.107   | 0.067   | 0.152   |
| a-Pinene                      | 0.000   | 0.265   | 0.000   | 0.048   | 0.000   | 0.086   | 0.000   | 0.866   | 0.923   | 0.000   |
| Disulfide_dimethyl            | 0.000   | 0.162   | 0.147   | 0.171   | 0.000   | 0.000   | 1.128   | 0.358   | 0.037   | 0.191   |
| Butanoic_acid_3-methyl-ethyl  | 0.000   | 0.026   | 0.036   | 0.018   | 0.156   | 0.000   | 0.000   | 0.000   | 0.000   | 0.016   |
| Methyl_valerate               | 0.590   | 0.053   | 0.458   | 0.316   | 0.200   | 0.218   | 0.000   | 0.000   | 0.000   | 0.000   |
| b-Pinene                      | 0.000   | 0.279   | 0.000   | 0.000   | 0.000   | 0.000   | 0.120   | 5.199   | 0.000   | 0.000   |
| Butanoic_acid_propyl ester    | 9.636   | 0.000   | 0.000   | 0.120   | 0.348   | 0.086   | 0.000   | 0.000   | 0.000   | 0.000   |
| 3-Carene                      | 0.000   | 1.059   | 0.000   | 0.177   | 0.000   | 0.163   | 0.000   | 0.159   | 0.182   | 0.000   |
| Pentanoic_acid_ethyl ester    | 3.051   | 0.000   | 0.256   | 0.199   | 0.691   | 0.282   | 0.000   | 0.000   | 0.000   | 0.162   |
| (2E4E)-37-Dimethylocta-24-d   | 0.000   | 0.000   | 0.502   | 0.392   | 0.000   | 0.106   | 0.000   | 0.216   | 0.000   | 0.000   |
| a-Phellandrene                | 0.000   | 0.096   | 0.000   | 0.000   | 0.000   | 0.039   | 0.000   | 0.000   | 0.107   | 0.000   |
| b-Myrcene                     | 0.000   | 0.000   | 0.000   | 0.111   | 0.000   | 0.191   | 0.000   | 0.284   | 7.208   | 0.000   |
| Isovaleric_acid_propyl ester  | 0.343   | 0.000   | 0.000   | 0.000   | 0.411   | 0.000   | 0.000   | 0.000   | 0.000   | 0.000   |
| Terpinolene                   | 0.000   | 0.000   | 0.000   | 0.000   | 0.000   | 0.255   | 0.000   | 0.291   | 0.000   | 0.000   |
| 1-Butanol                     | 0.218   | 0.130   | 0.000   | 0.000   | 0.390   | 0.138   | 0.000   | 0.026   | 0.000   | 0.000   |
| D-Limonene                    | 0.587   | 1.855   | 19.410  | 8.726   | 0.762   | 0.582   | 0.587   | 145.246 | 438.882 | 0.450   |
| beta-Phellandrene             | 0.000   | 0.080   | 0.000   | 0.000   | 0.000   | 0.000   | 0.000   | 0.000   | 0.000   | 0.000   |
| Butanoic_acid_butyl ester     | 0.000   | 0.000   | 0.047   | 0.075   | 0.211   | 0.089   | 0.000   | 0.000   | 0.000   | 0.000   |
| Pentanoic_acid_propyl ester   | 6.979   | 0.000   | 0.133   | 0.000   | 0.320   | 0.000   | 0.000   | 0.000   | 0.000   | 0.000   |
| g-Terpinene                   | 0.000   | 0.000   | 0.097   | 0.398   | 0.594   | 1.747   | 0.000   | 9.639   | 0.000   | 0.058   |
| Hexanoic_acid_ethyl ester     | 1.597   | 0.000   | 0.554   | 0.443   | 0.997   | 1.171   | 0.000   | 0.000   | 0.000   | 0.000   |

|                               |        |       |       |       |       |       |       |        |       |       |
|-------------------------------|--------|-------|-------|-------|-------|-------|-------|--------|-------|-------|
| 1-Butanol_3-methyl-           | 0.000  | 0.000 | 0.091 | 0.000 | 0.000 | 0.000 | 0.000 | 0.000  | 0.000 | 0.167 |
| b-Ocimene                     | 0.000  | 0.000 | 0.000 | 0.000 | 0.000 | 0.000 | 0.000 | 0.003  | 0.000 | 0.103 |
| Styrene                       | 0.000  | 0.000 | 0.000 | 0.000 | 0.000 | 0.000 | 0.000 | 0.000  | 0.000 | 0.000 |
| p-Cymene                      | 0.000  | 0.220 | 0.000 | 0.072 | 0.493 | 1.621 | 0.000 | 0.927  | 0.000 | 0.000 |
| 2-Heptanone_5-methyl-         | 0.187  | 0.000 | 0.065 | 0.000 | 0.000 | 0.000 | 0.153 | 0.000  | 0.000 | 0.075 |
| 2-Carene                      | 0.000  | 0.000 | 0.037 | 0.000 | 0.000 | 0.000 | 0.000 | 0.000  | 0.000 | 0.000 |
| 1-Pentanol                    | 0.000  | 0.000 | 0.188 | 0.000 | 0.000 | 0.000 | 0.000 | 0.000  | 0.000 | 0.066 |
| Acetic_acid_hexyl_ester       | 0.019  | 0.000 | 0.000 | 0.000 | 0.019 | 0.095 | 0.000 | 0.000  | 0.000 | 0.000 |
| Pentanoic_acid_4-methyl- pen  | 0.000  | 0.000 | 0.000 | 0.000 | 0.000 | 0.000 | 0.000 | 0.000  | 0.000 | 0.000 |
| Octanal                       | 0.000  | 0.000 | 0.000 | 0.000 | 0.000 | 0.000 | 0.000 | 0.000  | 0.000 | 0.169 |
| 2-Octanone                    | 0.000  | 0.000 | 0.307 | 0.221 | 0.109 | 0.128 | 0.211 | 0.000  | 0.000 | 0.000 |
| Acetoin                       | 0.000  | 0.000 | 2.472 | 0.000 | 0.000 | 0.000 | 0.000 | 10.972 | 0.595 | 0.137 |
| Pentanoic_acid_butyl ester    | 2.476  | 0.045 | 0.108 | 0.278 | 0.200 | 0.077 | 0.000 | 0.000  | 0.000 | 0.000 |
| Butanoic_acid_pentyl ester    | 0.000  | 0.000 | 0.000 | 0.000 | 0.000 | 0.051 | 0.000 | 0.000  | 0.000 | 0.000 |
| Hexanoic_acid_propyl ester    | 2.141  | 0.000 | 0.208 | 0.159 | 0.304 | 0.184 | 0.000 | 0.000  | 0.000 | 0.000 |
| Tridecane                     | 0.000  | 0.000 | 0.000 | 0.000 | 0.000 | 0.000 | 0.038 | 0.000  | 0.000 | 0.004 |
| 5-Hepten-2-one_6-methyl-      | 0.577  | 1.367 | 1.043 | 3.240 | 0.394 | 1.380 | 1.430 | 0.000  | 0.395 | 2.152 |
| Heptanoic_acid_ethyl ester    | 0.000  | 0.000 | 0.184 | 0.000 | 0.071 | 0.751 | 0.000 | 0.000  | 0.000 | 0.000 |
| Dimethyl_trisulfide           | 0.000  | 0.041 | 0.000 | 0.000 | 0.000 | 0.000 | 0.309 | 0.264  | 0.000 | 0.000 |
| Allyl_Isothiocyanate          | 0.000  | 0.000 | 0.000 | 0.259 | 0.037 | 0.000 | 0.000 | 0.000  | 0.000 | 0.000 |
| 2-Hydroxy-3-pentanone         | 0.000  | 0.000 | 0.000 | 0.000 | 0.000 | 0.000 | 0.000 | 0.105  | 0.000 | 0.000 |
| Hexanoic_acid_isobutyl ester  | 0.000  | 0.000 | 0.000 | 0.000 | 0.000 | 0.000 | 0.000 | 0.000  | 0.000 | 0.000 |
| 2-butyl-1-octanol             | 0.009  | 0.038 | 0.000 | 0.000 | 0.000 | 0.039 | 0.903 | 0.000  | 0.024 | 0.348 |
| Cyclohexanecarboxylic acid me | 1.375  | 0.000 | 0.210 | 0.067 | 0.000 | 0.000 | 0.000 | 0.000  | 0.000 | 0.000 |
| 1-Hexanol                     | 0.000  | 0.031 | 0.329 | 0.702 | 0.949 | 0.851 | 0.000 | 0.000  | 0.000 | 0.000 |
| Nonanal                       | 0.529  | 0.863 | 0.207 | 0.144 | 0.288 | 0.754 | 0.280 | 0.410  | 0.228 | 0.632 |
| 2-Nonanone                    | 0.000  | 0.000 | 0.289 | 0.107 | 0.081 | 0.000 | 0.093 | 0.000  | 0.000 | 0.000 |
| Cyclohexanecarboxylic acid et | 3.387  | 0.000 | 0.041 | 0.000 | 0.024 | 0.000 | 0.000 | 0.000  | 0.014 | 0.000 |
| Perillene                     | 0.000  | 0.087 | 0.000 | 0.041 | 0.000 | 0.025 | 0.013 | 0.000  | 0.003 | 0.049 |
| Pentanoic_acid_pentyl ester   | 0.000  | 0.154 | 0.000 | 0.000 | 0.000 | 0.000 | 0.000 | 0.000  | 0.000 | 0.000 |
| Hexanoic_acid_butyl ester     | 1.054  | 0.000 | 0.200 | 0.518 | 0.347 | 0.277 | 0.000 | 0.000  | 0.000 | 0.000 |
| Butanoic_acid_hexyl ester     | 0.000  | 0.000 | 0.000 | 0.000 | 0.343 | 0.319 | 0.000 | 0.000  | 0.000 | 0.000 |
| Tetradecane                   | 0.136  | 0.876 | 0.482 | 0.339 | 0.206 | 0.363 | 0.000 | 0.000  | 0.000 | 0.682 |
| Octanoic_acid_ethyl ester     | 0.000  | 0.000 | 0.000 | 0.000 | 0.000 | 0.224 | 0.000 | 0.000  | 0.000 | 0.000 |
| Acetic_acid                   | 14.275 | 2.532 | 8.615 | 2.145 | 3.801 | 2.564 | 0.922 | 5.709  | 1.173 | 2.128 |
| (+)-2-Bornanone               | 0.000  | 0.000 | 0.000 | 0.000 | 0.000 | 0.000 | 0.000 | 0.000  | 0.000 | 0.000 |
| 2-Decanone                    | 0.000  | 0.000 | 0.000 | 0.000 | 0.000 | 0.000 | 0.000 | 0.000  | 0.000 | 0.000 |
| Benzaldehyde                  | 0.849  | 1.865 | 0.877 | 0.596 | 0.927 | 0.750 | 4.808 | 1.048  | 1.398 | 1.998 |
| 1-Hexanol_2-ethyl-            | 0.000  | 0.000 | 0.000 | 0.000 | 0.000 | 0.000 | 0.273 | 0.000  | 0.000 | 0.085 |

|                               |        |        |        |        |        |        |        |        |        |         |
|-------------------------------|--------|--------|--------|--------|--------|--------|--------|--------|--------|---------|
| 2-Nonenal_(E)-                | 0.000  | 0.096  | 0.036  | 0.077  | 0.057  | 0.117  | 0.092  | 0.065  | 0.000  | 0.176   |
| Pentadecane                   | 0.000  | 0.000  | 0.860  | 0.437  | 0.464  | 0.390  | 0.017  | 0.000  | 0.186  | 0.000   |
| Propanoic_acid                | 18.939 | 3.720  | 4.978  | 2.006  | 3.431  | 1.907  | 1.585  | 2.634  | 0.915  | 2.466   |
| Caparratriene                 | 0.000  | 0.000  | 0.000  | 0.000  | 0.000  | 0.000  | 0.000  | 0.000  | 0.000  | 0.000   |
| 1-Pentadecene                 | 0.000  | 0.000  | 0.474  | 0.101  | 0.048  | 0.000  | 0.014  | 0.000  | 0.002  | 0.361   |
| Linalool                      | 0.155  | 0.323  | 0.000  | 0.000  | 0.297  | 0.352  | 0.000  | 0.180  | 0.000  | 0.000   |
| Propanoic_acid_2-methyl-      | 2.797  | 1.240  | 2.050  | 0.642  | 1.199  | 0.834  | 0.357  | 0.901  | 0.210  | 1.744   |
| Caryophyllene                 | 0.302  | 2.677  | 0.129  | 1.380  | 0.357  | 1.530  | 1.210  | 1.066  | 1.779  | 0.241   |
| Methyl_carvacrol              | 0.000  | 0.000  | 0.000  | 0.000  | 0.531  | 0.374  | 0.000  | 0.000  | 0.000  | 0.000   |
| Dichloroacetic_acid_4-pentade | 0.000  | 0.000  | 0.000  | 0.000  | 0.000  | 0.000  | 0.000  | 0.000  | 0.000  | 0.000   |
| 2-Undecanone                  | 0.214  | 0.738  | 0.915  | 0.697  | 0.493  | 0.506  | 0.678  | 0.370  | 0.291  | 0.692   |
| 159-Decatriene_2358-tetr      | 0.000  | 0.000  | 0.000  | 0.000  | 0.000  | 0.000  | 0.297  | 0.000  | 0.000  | 0.000   |
| Benzeneacetaldehyd e          | 0.000  | 0.000  | 0.000  | 0.000  | 0.000  | 0.000  | 0.000  | 0.299  | 0.345  | 1.005   |
| Butanoic_acid                 | 67.687 | 12.855 | 16.723 | 14.696 | 26.837 | 17.790 | 2.164  | 8.246  | 2.009  | 6.734   |
| Hexadecane                    | 0.133  | 0.270  | 0.262  | 0.233  | 0.208  | 0.283  | 0.472  | 0.171  | 0.075  | 0.256   |
| Levomenthol                   | 0.000  | 0.000  | 0.282  | 0.444  | 1.009  | 0.990  | 0.226  | 0.000  | 0.000  | 0.289   |
| Hexanoic_acid_2-methyl-       | 10.680 | 7.676  | 9.884  | 3.861  | 7.867  | 4.975  | 1.698  | 4.836  | 0.876  | 7.983   |
| Cetene                        | 0.000  | 0.000  | 0.134  | 0.090  | 0.041  | 0.042  | 0.000  | 0.000  | 0.000  | 0.069   |
| Valencene                     | 0.000  | 0.214  | 1.404  | 0.562  | 0.409  | 0.000  | 0.000  | 0.474  | 49.734 | 0.000   |
| a-Muurolene                   | 0.000  | 0.000  | 0.000  | 0.000  | 0.000  | 0.000  | 0.000  | 0.000  | 0.529  | 0.000   |
| b-Bisabolene                  | 0.000  | 0.000  | 0.000  | 0.179  | 0.000  | 0.000  | 0.103  | 0.570  | 0.000  | 0.388   |
| Nonadecane                    | 0.000  | 0.000  | 0.000  | 0.000  | 0.000  | 0.000  | 0.000  | 0.000  | 0.000  | 0.000   |
| Pentanoic_acid                | 28.656 | 12.887 | 20.864 | 12.891 | 12.662 | 11.992 | 2.566  | 5.091  | 0.682  | 5.684   |
| g-Cadinene                    | 0.000  | 0.000  | 0.000  | 0.000  | 0.000  | 0.000  | 0.000  | 0.000  | 0.000  | 0.000   |
| trans-g-Bisabolene            | 0.000  | 0.397  | 0.000  | 0.075  | 0.000  | 0.722  | 0.000  | 0.000  | 0.157  | 0.504   |
| trans-a-Bisabolene            | 0.000  | 0.088  | 0.000  | 0.135  | 0.000  | 0.000  | 0.000  | 0.000  | 0.000  | 0.399   |
| Aromandendrene                | 0.000  | 0.000  | 0.000  | 0.000  | 0.000  | 0.000  | 0.000  | 0.000  | 0.000  | 0.000   |
| Pentanoic_acid_4-methyl-      | 0.414  | 0.432  | 0.215  | 0.000  | 0.164  | 0.184  | 0.109  | 0.603  | 0.034  | 0.000   |
| Germacrene_B                  | 0.000  | 0.000  | 0.000  | 0.000  | 0.000  | 0.000  | 0.000  | 0.000  | 0.000  | 0.000   |
| Anethole                      | 0.741  | 0.217  | 0.000  | 0.164  | 1.515  | 0.119  | 0.090  | 0.085  | 0.000  | 0.107   |
| 2-Tridecanone                 | 0.134  | 0.259  | 0.380  | 0.151  | 0.233  | 0.156  | 0.347  | 0.291  | 0.405  | 0.808   |
| Octadecane                    | 0.000  | 0.000  | 0.000  | 0.000  | 0.000  | 0.000  | 1.379  | 0.000  | 0.000  | 0.176   |
| Hexanoic_acid                 | 24.059 | 7.137  | 41.350 | 34.799 | 39.419 | 46.992 | 0.613  | 0.783  | 0.258  | 0.933   |
| 59-Undecadien-2-one_610-dim   | 0.420  | 0.286  | 0.475  | 0.383  | 0.000  | 0.000  | 0.189  | 0.050  | 0.175  | 0.155   |
| 2-Tetradecanone               | 0.098  | 0.118  | 0.084  | 0.078  | 0.124  | 0.163  | 0.123  | 0.000  | 0.033  | 0.000   |
| Phenylethyl_Alcohol           | 0.387  | 0.450  | 2.283  | 0.626  | 0.373  | 0.000  | 0.074  | 0.114  | 0.175  | 0.375   |
| 2-Tetradecanone               | 0.000  | 0.079  | 0.000  | 0.000  | 0.000  | 0.000  | 0.122  | 0.000  | 0.037  | 0.058   |
| Heptanoic_acid                | 1.938  | 0.783  | 0.370  | 0.221  | 10.677 | 26.467 | 0.235  | 0.235  | 0.000  | 0.284   |
| Phenol                        | 0.362  | 0.354  | 0.715  | 0.933  | 1.778  | 0.651  | 12.226 | 3.576  | 0.894  | 0.555   |
| 2-Pentadecanone               | 0.197  | 0.208  | 0.287  | 0.115  | 0.158  | 0.178  | 0.264  | 0.166  | 0.205  | 0.215   |
| 3-Phenylpropanol              | 0.031  | 0.037  | 0.165  | 0.177  | 0.265  | 0.133  | 0.000  | 0.000  | 0.106  | 0.036   |
| Octanoic_acid                 | 0.422  | 0.162  | 6.690  | 2.377  | 1.511  | 12.220 | 0.104  | 0.137  | 0.082  | 0.154   |
| Phenol_2-methyl-              | 12.165 | 69.959 | 59.164 | 51.602 | 49.067 | 40.975 | 79.538 | 73.872 | 43.140 | 102.534 |
| 2-Hexadecanone                | 0.000  | 0.000  | 0.000  | 0.000  | 0.000  | 0.000  | 0.000  | 0.000  | 0.000  | 0.000   |
| 2-Piperidinone                | 1.244  | 0.000  | 0.309  | 0.000  | 0.333  | 0.147  | 0.000  | 0.000  | 0.000  | 0.000   |
| 2-Tridecanol                  | 0.000  | 0.000  | 0.163  | 0.000  | 0.000  | 0.000  | 0.001  | 0.034  | 0.000  | 0.000   |

|                               |           |           |                         |                         |           |           |           |           |           |           |
|-------------------------------|-----------|-----------|-------------------------|-------------------------|-----------|-----------|-----------|-----------|-----------|-----------|
| Nonanoic_acid                 | 8.910     | 5.787     | 5.557                   | 3.235                   | 2.129     | 0.728     | 0.739     | 7.567     | 5.230     | 7.840     |
| Carvacrol                     | 0.000     | 0.000     | 0.000                   | 0.139                   | 2.058     | 5.861     | 0.000     | 0.000     | 0.000     | 0.000     |
| Ethanone_1-(2-aminophenyl)-   | 0.000     | 0.000     | 0.000                   | 0.000                   | 0.000     | 0.270     | 0.182     | 0.000     | 0.000     | 0.702     |
| 1H-Pyrrole-25-dione_3-ethyl-  | 0.428     | 0.560     | 0.292                   | 0.000                   | 0.454     | 0.522     | 1.434     | 0.255     | 0.328     | 0.853     |
| 1-Tetracosene                 | 0.000     | 0.020     | 0.151                   | 0.078                   | 0.000     | 0.000     | 0.000     | 0.219     | 0.042     | 0.105     |
| n-Decanoic_acid               | 0.290     | 0.003     | 0.759                   | 0.266                   | 0.180     | 0.245     | 0.000     | 0.000     | 0.000     | 0.000     |
| 1-Hexadecanol                 | 1.371     | 0.635     | 4.881                   | 2.528                   | 0.349     | 0.317     | 1.766     | 1.379     | 3.207     | 1.793     |
| (Z)6-Pentadecen-1-ol          | 0.340     | 0.129     | 0.298                   | 0.367                   | 0.325     | 0.000     | 5.713     | 2.616     | 0.091     | 0.000     |
| g-Dodecalactone               | 0.139     | 1.034     | 0.527                   | 0.313                   | 0.430     | 0.688     | 0.717     | 1.299     | 0.128     | 0.332     |
| Indole                        | 17.766    | 7.645     | 12.651                  | 11.033                  | 28.114    | 15.587    | 37.618    | 10.604    | 21.807    | 37.058    |
| 1H-Indole_5-methyl-           | 2.228     | 3.621     | 0.000                   | 0.000                   | 3.278     | 1.016     | 4.055     | 12.336    | 0.670     | 2.059     |
| Benzeneacetic_acid            | 0.657     | 0.000     | 0.422                   | 0.087                   | 0.213     | 0.274     | 0.000     | 0.000     | 0.000     | 0.000     |
| Benzenepropanoic_acid_silver( | 0.697     | 0.095     | 0.946                   | 0.347                   | 0.664     | 0.847     | 0.000     | 0.247     | 0.130     | 0.000     |
| 2H-Indol-2-one_13-dihydro-    | 0.092     | 0.182     | 0.246                   | 0.146                   | 0.079     | 0.046     | 0.134     | 0.244     | 0.047     | 0.072     |
| sample_id                     | 20092_1   | 20092_2   | 20095_1                 | 20095_2                 | 20102_1   | 20102_2   | 20104_1   | 20104_2   | 20105_1   | 20105_2   |
| group                         | ATFI<br>S | ATFI<br>S | LGI<br>MD-<br>ATFI<br>S | LGI<br>MD-<br>ATFI<br>S | ATFI<br>S | ATFI<br>S | ATFI<br>S | ATFI<br>S | ATFI<br>S | ATFI<br>S |
| Methyl_acetate                | 0.000     | 0.000     | 0.000                   | 0.000                   | 0.192     | 0.362     | 0.000     | 0.000     | 0.000     | 0.000     |
| Ethyl_Acetate                 | 0.000     | 0.215     | 0.000                   | 0.000                   | 0.286     | 0.336     | 0.000     | 0.000     | 0.000     | 0.000     |
| 2-Butanone                    | 0.101     | 0.301     | 0.147                   | 0.149                   | 0.012     | 0.031     | 0.161     | 0.140     | 0.113     | 0.062     |
| Butanal_3-methyl-             | 2.513     | 0.474     | 2.047                   | 1.704                   | 0.444     | 0.725     | 2.685     | 2.505     | 0.874     | 2.297     |
| Ethanol                       | 0.043     | 0.830     | 0.062                   | 0.000                   | 0.327     | 0.466     | 0.084     | 0.038     | 0.100     | 0.206     |
| Propanoic_acid_ethyl ester    | 0.000     | 0.381     | 0.000                   | 0.000                   | 0.274     | 0.458     | 0.000     | 0.000     | 0.000     | 0.000     |
| 2-Pentanone                   | 0.341     | 0.000     | 0.205                   | 0.000                   | 0.242     | 0.000     | 0.478     | 0.715     | 0.000     | 0.000     |
| Butanoic_acid_methyl ester    | 0.000     | 0.554     | 0.000                   | 0.000                   | 1.429     | 0.459     | 0.000     | 0.000     | 0.837     | 0.000     |
| Methyl_Isobutyl_Ketone        | 0.273     | 0.628     | 0.056                   | 0.046                   | 0.039     | 0.037     | 0.138     | 0.162     | 0.030     | 0.069     |
| a-Pinene                      | 0.368     | 0.636     | 0.132                   | 12.657                  | 0.000     | 0.233     | 0.083     | 0.000     | 0.000     | 0.102     |
| Disulfide_dimethyl            | 0.212     | 0.000     | 1.948                   | 0.986                   | 0.000     | 0.000     | 0.710     | 0.654     | 0.000     | 0.000     |
| Butanoic_acid_3-methyl-ethyl  | 0.042     | 0.000     | 0.000                   | 0.018                   | 0.000     | 0.000     | 0.022     | 0.000     | 0.013     | 0.000     |
| Methyl_valerate               | 0.000     | 0.175     | 0.000                   | 0.000                   | 0.000     | 0.000     | 0.000     | 0.000     | 0.166     | 0.000     |
| b-Pinene                      | 0.000     | 0.201     | 0.000                   | 6.365                   | 0.000     | 0.000     | 0.303     | 0.000     | 0.000     | 0.312     |
| Butanoic_acid_propyl ester    | 0.000     | 2.139     | 0.000                   | 0.000                   | 1.182     | 0.384     | 0.000     | 0.000     | 0.213     | 0.000     |
| 3-Carene                      | 0.000     | 0.504     | 0.000                   | 0.487                   | 0.000     | 0.000     | 0.000     | 0.000     | 0.000     | 0.105     |
| Pentanoic_acid_ethyl ester    | 0.000     | 1.080     | 0.000                   | 0.000                   | 0.166     | 0.088     | 0.000     | 0.000     | 0.000     | 0.000     |
| (2E4E)-37-Dimethylocta-24-d   | 0.613     | 2.103     | 0.956                   | 0.706                   | 0.000     | 0.286     | 0.495     | 0.518     | 0.000     | 0.000     |
| a-Phellandrene                | 0.000     | 0.427     | 0.000                   | 0.808                   | 0.000     | 0.169     | 0.000     | 0.000     | 0.000     | 0.000     |
| b-Myrcene                     | 0.000     | 1.130     | 0.000                   | 2.764                   | 0.000     | 0.404     | 0.000     | 0.000     | 0.000     | 0.000     |
| Isovaleric_acid_propyl ester  | 0.000     | 0.000     | 0.000                   | 0.000                   | 0.072     | 0.000     | 0.000     | 0.000     | 0.000     | 0.000     |
| Terpinolene                   | 0.000     | 0.000     | 0.000                   | 1.100                   | 0.000     | 0.168     | 0.000     | 0.000     | 0.000     | 0.000     |
| 1-Butanol                     | 0.010     | 0.000     | 0.000                   | 0.079                   | 1.239     | 1.109     | 0.000     | 0.000     | 0.836     | 0.000     |

|                               |       |       |        |        |       |        |       |       |       |       |
|-------------------------------|-------|-------|--------|--------|-------|--------|-------|-------|-------|-------|
| D-Limonene                    | 1.599 | 0.000 | 23.574 | 18.756 | 0.000 | 0.766  | 4.231 | 1.216 | 0.000 | 6.926 |
| beta-Phellandrene             | 0.000 | 0.000 | 0.000  | 8.157  | 0.000 | 0.000  | 0.000 | 0.000 | 0.000 | 0.000 |
| Butanoic_acid_butyl ester     | 0.037 | 2.418 | 0.000  | 0.000  | 1.336 | 0.037  | 0.000 | 0.000 | 0.281 | 0.000 |
| Pentanoic_acid_propyl ester   | 0.000 | 1.444 | 0.000  | 0.000  | 0.000 | 0.000  | 0.000 | 0.000 | 0.150 | 0.000 |
| g-Terpinene                   | 0.000 | 0.000 | 0.302  | 2.154  | 0.000 | 0.000  | 0.588 | 0.000 | 0.000 | 0.953 |
| Hexanoic_acid_ethyl ester     | 0.000 | 0.000 | 0.000  | 0.156  | 0.000 | 0.000  | 0.094 | 0.000 | 0.000 | 0.000 |
| 1-Butanol_3-methyl-           | 0.000 | 0.263 | 0.433  | 0.000  | 0.000 | 0.079  | 0.000 | 0.000 | 0.057 | 0.101 |
| b-Ocimene                     | 0.000 | 0.000 | 0.000  | 0.000  | 0.000 | 0.000  | 0.000 | 0.000 | 0.000 | 0.000 |
| Styrene                       | 0.000 | 0.000 | 0.000  | 0.000  | 0.000 | 0.000  | 0.066 | 0.015 | 0.030 | 0.247 |
| p-Cymene                      | 0.000 | 0.192 | 0.029  | 0.732  | 0.000 | 0.000  | 0.078 | 0.000 | 0.000 | 0.163 |
| 2-Heptanone_5-methyl-         | 0.000 | 0.000 | 0.000  | 0.000  | 0.000 | 0.000  | 0.000 | 0.054 | 0.000 | 0.083 |
| 2-Carene                      | 0.000 | 0.334 | 0.092  | 0.012  | 0.000 | 0.141  | 0.102 | 0.228 | 0.000 | 0.000 |
| 1-Pentanol                    | 0.000 | 0.434 | 0.096  | 0.258  | 0.000 | 0.063  | 0.109 | 0.035 | 0.383 | 0.159 |
| Acetic_acid_hexyl ester       | 0.000 | 0.000 | 0.000  | 0.000  | 0.000 | 0.000  | 0.000 | 0.000 | 0.000 | 0.000 |
| Pentanoic_acid_4-methyl- pen  | 0.000 | 0.131 | 0.000  | 0.000  | 0.000 | 0.000  | 0.000 | 0.000 | 0.000 | 0.000 |
| Octanal                       | 0.000 | 0.154 | 0.000  | 0.000  | 0.000 | 0.076  | 0.000 | 0.000 | 0.088 | 0.113 |
| 2-Octanone                    | 0.000 | 0.000 | 0.165  | 0.283  | 0.000 | 0.000  | 0.000 | 0.330 | 0.000 | 0.121 |
| Acetoin                       | 0.038 | 0.000 | 0.127  | 0.000  | 0.000 | 0.000  | 0.000 | 0.000 | 0.000 | 0.066 |
| Pentanoic_acid_butyl ester    | 0.022 | 1.573 | 0.000  | 0.044  | 0.058 | 0.000  | 0.000 | 0.000 | 0.163 | 0.000 |
| Butanoic_acid_pentyl ester    | 0.031 | 0.000 | 0.000  | 0.000  | 0.000 | 0.000  | 0.000 | 0.000 | 0.000 | 0.000 |
| Hexanoic_acid_propyl ester    | 0.000 | 0.000 | 0.000  | 0.000  | 0.000 | 0.000  | 0.000 | 0.000 | 0.000 | 0.000 |
| Tridecane                     | 0.007 | 0.000 | 0.073  | 0.110  | 0.000 | 0.000  | 0.027 | 0.000 | 0.082 | 0.005 |
| 5-Hepten-2-one_6-methyl-      | 8.266 | 2.391 | 1.028  | 6.194  | 0.167 | 0.498  | 2.953 | 1.458 | 0.619 | 3.059 |
| Heptanoic_acid_ethyl ester    | 0.000 | 0.000 | 0.000  | 0.000  | 0.000 | 0.000  | 0.000 | 0.000 | 0.000 | 0.000 |
| Dimethyl trisulfide           | 0.000 | 0.000 | 0.922  | 0.597  | 0.000 | 0.000  | 0.266 | 0.113 | 0.000 | 0.000 |
| Allyl Isothiocyanate          | 0.000 | 1.012 | 0.000  | 0.000  | 0.000 | 0.000  | 0.000 | 0.000 | 0.000 | 0.000 |
| 2-Hydroxy-3-pentanone         | 0.000 | 0.000 | 0.061  | 0.000  | 0.000 | 0.000  | 0.100 | 0.075 | 0.000 | 0.000 |
| Hexanoic_acid_isobutyl ester  | 0.000 | 0.000 | 0.000  | 0.000  | 0.000 | 0.000  | 0.000 | 0.000 | 0.000 | 0.000 |
| 2-butyl-1-octanol             | 0.000 | 0.000 | 0.000  | 0.282  | 0.000 | 0.000  | 0.000 | 0.008 | 0.199 | 0.010 |
| Cyclohexanecarboxylic acid me | 0.000 | 0.532 | 0.000  | 0.000  | 5.052 | 34.323 | 0.000 | 0.000 | 0.407 | 0.000 |
| 1-Hexanol                     | 0.024 | 0.409 | 0.214  | 0.789  | 0.000 | 0.000  | 0.253 | 0.134 | 0.000 | 0.000 |
| Nonanal                       | 0.152 | 0.723 | 0.324  | 0.277  | 0.736 | 0.610  | 0.347 | 0.338 | 0.928 | 0.965 |
| 2-Nonanone                    | 0.000 | 0.000 | 0.000  | 0.069  | 0.000 | 0.000  | 0.052 | 0.124 | 0.000 | 0.196 |
| Cyclohexanecarboxylic acid et | 0.000 | 1.311 | 0.000  | 0.000  | 7.148 | 39.620 | 0.045 | 0.000 | 0.000 | 0.000 |
| Perillene                     | 0.001 | 0.000 | 0.011  | 0.081  | 0.000 | 0.000  | 0.031 | 0.010 | 0.000 | 0.000 |
| Pentanoic_acid_pentyl ester   | 0.000 | 0.236 | 0.000  | 0.000  | 0.000 | 0.000  | 0.000 | 0.000 | 0.000 | 0.000 |
| Hexanoic_acid_butyl ester     | 0.000 | 0.000 | 0.000  | 0.161  | 0.000 | 0.000  | 0.000 | 0.000 | 0.000 | 0.000 |
| Butanoic_acid_hexyl ester     | 0.000 | 0.151 | 0.000  | 0.111  | 0.000 | 0.000  | 0.000 | 0.000 | 0.000 | 0.000 |

|                               |        |        |        |        |        |        |        |        |        |        |
|-------------------------------|--------|--------|--------|--------|--------|--------|--------|--------|--------|--------|
| Tetradecane                   | 0.807  | 0.358  | 0.235  | 1.181  | 0.059  | 0.095  | 0.724  | 0.428  | 0.425  | 0.355  |
| Octanoic_acid_ethyl ester     | 0.000  | 0.000  | 0.000  | 0.000  | 0.000  | 0.000  | 0.000  | 0.000  | 0.000  | 0.000  |
| Acetic_acid                   | 2.503  | 13.491 | 1.862  | 2.993  | 4.143  | 13.467 | 2.914  | 1.682  | 7.433  | 3.492  |
| (+)-2-Bornanone               | 0.000  | 0.000  | 0.000  | 5.603  | 0.000  | 0.000  | 0.000  | 0.000  | 0.000  | 0.000  |
| 2-Decanone                    | 0.000  | 0.000  | 0.000  | 0.000  | 0.000  | 0.000  | 0.000  | 0.000  | 0.011  | 0.000  |
| Benzaldehyde                  | 1.729  | 4.756  | 1.799  | 1.146  | 0.399  | 1.957  | 1.657  | 2.557  | 0.808  | 3.190  |
| 1-Hexanol_2-ethyl-            | 0.000  | 0.000  | 0.000  | 0.000  | 0.000  | 0.000  | 0.000  | 0.000  | 0.000  | 0.152  |
| 2-Nonenal_(E)-                | 0.038  | 0.199  | 0.091  | 0.000  | 0.353  | 0.089  | 0.116  | 0.079  | 0.228  | 0.075  |
| Pentadecane                   | 0.476  | 0.000  | 1.956  | 0.000  | 0.000  | 0.000  | 0.000  | 0.471  | 0.000  | 0.027  |
| Propanoic_acid                | 1.907  | 8.458  | 22.463 | 2.668  | 2.171  | 6.350  | 2.834  | 0.994  | 2.874  | 1.750  |
| Caparratriene                 | 0.000  | 0.000  | 0.000  | 0.000  | 0.000  | 0.000  | 0.000  | 0.000  | 0.000  | 0.000  |
| 1-Pentadecene                 | 0.184  | 0.000  | 0.602  | 0.286  | 0.000  | 0.000  | 0.167  | 0.221  | 0.004  | 0.000  |
| Linalool                      | 0.000  | 2.205  | 0.000  | 0.760  | 0.392  | 0.420  | 0.000  | 0.000  | 0.507  | 0.000  |
| Propanoic_acid_2-methyl-      | 1.957  | 0.945  | 1.004  | 1.924  | 0.081  | 0.426  | 1.789  | 1.024  | 1.131  | 0.411  |
| Caryophyllene                 | 0.369  | 1.979  | 1.237  | 34.348 | 0.183  | 0.448  | 0.579  | 0.740  | 0.554  | 1.567  |
| Methyl_carvacrol              | 0.000  | 0.041  | 0.000  | 0.000  | 0.000  | 0.000  | 0.000  | 0.000  | 0.002  | 0.000  |
| Dichloroacetic_acid_4-pentade | 0.000  | 0.000  | 0.000  | 0.000  | 0.000  | 0.000  | 0.000  | 0.000  | 0.000  | 0.000  |
| 2-Undecanone                  | 0.497  | 0.815  | 0.488  | 1.237  | 0.540  | 0.278  | 0.592  | 0.678  | 0.329  | 0.658  |
| 159-Decatriene_2358-tetr      | 0.000  | 0.000  | 0.697  | 0.238  | 0.000  | 0.000  | 0.000  | 0.000  | 0.000  | 0.000  |
| Benzeneacetaldehyd e          | 0.260  | 0.000  | 0.000  | 0.000  | 0.000  | 0.000  | 0.624  | 0.519  | 0.000  | 0.000  |
| Butanoic_acid                 | 16.740 | 52.060 | 4.158  | 9.001  | 45.989 | 50.256 | 8.740  | 4.563  | 30.808 | 13.719 |
| Hexadecane                    | 0.205  | 0.000  | 0.743  | 0.457  | 0.000  | 0.000  | 0.309  | 0.376  | 0.394  | 0.528  |
| Levomenthol                   | 0.369  | 2.110  | 0.000  | 0.000  | 2.765  | 0.000  | 0.000  | 0.000  | 1.024  | 1.082  |
| Hexanoic_acid_2-methyl-       | 11.190 | 5.145  | 5.098  | 10.108 | 1.075  | 1.819  | 7.724  | 5.088  | 4.115  | 1.179  |
| Cetene                        | 0.150  | 0.000  | 0.125  | 0.084  | 0.000  | 0.000  | 0.086  | 0.215  | 0.000  | 0.002  |
| Valencene                     | 0.000  | 1.809  | 2.374  | 1.760  | 1.599  | 2.413  | 0.000  | 0.000  | 0.000  | 0.037  |
| a-Murolene                    | 0.000  | 0.000  | 0.210  | 0.169  | 0.000  | 0.000  | 0.000  | 0.000  | 0.000  | 0.000  |
| b-Bisabolene                  | 0.070  | 2.024  | 0.000  | 0.490  | 0.000  | 0.000  | 0.318  | 0.000  | 0.000  | 0.508  |
| Nonadecane                    | 0.000  | 0.000  | 0.000  | 0.000  | 0.000  | 0.000  | 0.085  | 0.000  | 0.000  | 0.000  |
| Pentanoic_acid                | 9.057  | 15.849 | 4.648  | 8.846  | 1.004  | 2.371  | 6.394  | 4.165  | 7.102  | 2.205  |
| g-Cadinene                    | 0.000  | 0.000  | 0.267  | 0.623  | 0.000  | 0.000  | 0.000  | 0.000  | 0.000  | 0.304  |
| trans-g-Bisabolene            | 0.000  | 27.620 | 0.000  | 0.000  | 0.000  | 2.620  | 0.392  | 0.323  | 0.743  | 0.000  |
| trans-a-Bisabolene            | 0.000  | 0.112  | 0.000  | 0.000  | 0.000  | 0.000  | 0.038  | 0.000  | 0.000  | 0.000  |
| Aromandendrene                | 0.084  | 1.182  | 0.078  | 0.000  | 0.000  | 1.113  | 0.164  | 0.252  | 0.000  | 0.000  |
| Pentanoic_acid_4-methyl-      | 1.934  | 2.239  | 0.109  | 0.192  | 0.407  | 0.254  | 0.185  | 0.221  | 0.650  | 0.526  |
| Germacrene_B                  | 0.000  | 0.000  | 0.000  | 0.667  | 0.000  | 0.000  | 0.000  | 0.000  | 0.000  | 0.000  |
| Anethole                      | 0.111  | 0.516  | 0.662  | 0.073  | 0.000  | 0.000  | 0.581  | 1.195  | 0.046  | 0.152  |
| 2-Tridecanone                 | 0.347  | 0.340  | 0.384  | 0.514  | 0.086  | 0.000  | 0.141  | 0.332  | 0.185  | 0.425  |
| Octadecane                    | 0.134  | 0.094  | 2.179  | 0.000  | 0.000  | 0.000  | 0.000  | 0.000  | 0.000  | 2.656  |
| Hexanoic_acid                 | 2.692  | 2.028  | 7.345  | 19.099 | 0.627  | 0.286  | 12.948 | 10.615 | 0.983  | 0.415  |
| 59-Undecadien-2-one_610-dim   | 0.180  | 0.000  | 0.244  | 0.418  | 0.000  | 0.067  | 0.269  | 0.264  | 0.089  | 0.141  |
| 2-Tetradecanone               | 0.097  | 0.000  | 0.119  | 0.000  | 0.000  | 0.000  | 0.000  | 0.077  | 0.000  | 0.109  |
| Phenylethyl_Alcohol           | 0.764  | 0.685  | 0.000  | 0.000  | 0.000  | 0.088  | 0.562  | 0.692  | 0.080  | 0.305  |
| 2-Tetradecanone               | 0.113  | 0.000  | 0.094  | 0.000  | 0.000  | 0.000  | 0.000  | 0.065  | 0.000  | 0.000  |
| Heptanoic_acid                | 0.207  | 0.000  | 4.362  | 10.907 | 0.092  | 0.108  | 4.504  | 7.603  | 0.115  | 0.000  |

|                               |                |                |                |                |                |                |        |        |        |        |
|-------------------------------|----------------|----------------|----------------|----------------|----------------|----------------|--------|--------|--------|--------|
| Phenol                        | 0.237          | 0.665          | 0.176          | 0.248          | 0.522          | 0.420          | 1.117  | 1.272  | 1.199  | 8.255  |
| 2-Pentadecanone               | 0.275          | 0.183          | 0.308          | 0.281          | 0.116          | 0.132          | 0.196  | 0.174  | 0.218  | 0.252  |
| 3-Phenylpropanol              | 0.143          | 0.099          | 0.000          | 0.000          | 0.000          | 0.000          | 0.000  | 0.046  | 0.001  | 0.001  |
| Octanoic_acid                 | 0.140          | 0.511          | 0.985          | 2.203          | 4.847          | 0.016          | 0.987  | 2.030  | 0.148  | 0.178  |
| Phenol_2-methyl-              | 69.849         | 11.547         | 47.433         | 59.173         | 26.927         | 154.373        | 90.477 | 59.222 | 37.020 | 32.753 |
| 2-Hexadecanone                | 0.000          | 0.000          | 0.000          | 0.000          | 0.000          | 0.000          | 0.000  | 0.000  | 0.000  | 0.000  |
| 2-Piperidinone                | 0.000          | 0.000          | 0.000          | 0.000          | 0.000          | 0.000          | 0.000  | 0.000  | 0.000  | 0.128  |
| 2-Tridecanol                  | 0.000          | 0.000          | 0.000          | 0.000          | 0.000          | 0.000          | 0.000  | 0.000  | 0.000  | 0.000  |
| Nonanoic_acid                 | 2.215          | 0.743          | 5.290          | 5.408          | 5.916          | 2.798          | 10.845 | 2.026  | 0.899  | 6.177  |
| Carvacrol                     | 0.000          | 0.325          | 0.000          | 0.000          | 0.000          | 0.000          | 0.000  | 0.000  | 0.411  | 0.000  |
| Ethanone_1-(2-aminophenyl)-   | 0.000          | 0.000          | 0.000          | 0.000          | 0.000          | 0.000          | 0.000  | 0.000  | 0.000  | 0.158  |
| 1H-Pyrrole-25-dione_3-ethyl-  | 0.268          | 0.361          | 0.169          | 0.243          | 0.109          | 0.931          | 0.325  | 0.254  | 1.207  | 0.707  |
| 1-Tetracosene                 | 0.234          | 0.051          | 0.000          | 0.000          | 0.000          | 0.000          | 0.104  | 0.130  | 0.000  | 0.000  |
| n-Decanoic_acid               | 0.104          | 0.164          | 0.287          | 0.314          | 1.115          | 0.000          | 0.178  | 0.066  | 0.000  | 0.000  |
| 1-Hexadecanol                 | 1.545          | 1.270          | 0.256          | 0.147          | 0.031          | 0.000          | 1.055  | 1.869  | 0.697  | 0.377  |
| (Z)6-Pentadecen-1-ol          | 0.000          | 0.891          | 0.000          | 0.000          | 0.000          | 0.000          | 0.151  | 0.252  | 1.356  | 0.133  |
| g-Dodecalactone               | 0.784          | 1.215          | 0.338          | 0.365          | 0.189          | 0.468          | 0.809  | 0.237  | 0.936  | 0.142  |
| Indole                        | 13.946         | 15.570         | 15.374         | 16.829         | 8.052          | 4.271          | 20.094 | 7.930  | 19.018 | 15.362 |
| 1H-Indole_5-methyl-           | 16.314         | 2.309          | 6.396          | 7.301          | 0.421          | 0.670          | 16.063 | 0.000  | 7.395  | 0.548  |
| Benzeneacetic_acid            | 0.184          | 0.000          | 0.000          | 0.189          | 0.000          | 0.000          | 0.000  | 0.000  | 0.000  | 0.000  |
| Benzenepropanoic_acid_silver( | 0.080          | 0.575          | 0.065          | 0.213          | 0.000          | 0.000          | 0.000  | 0.126  | 0.220  | 0.000  |
| 2H-Indol-2-one_13-dihydro-    | 0.048          | 0.000          | 0.141          | 0.266          | 0.043          | 0.000          | 0.108  | 0.097  | 0.100  | 0.037  |
| <b>sample_id</b>              | <b>20121_1</b> | <b>20121_2</b> | <b>20123_1</b> | <b>20123_2</b> | <b>20124_1</b> | <b>20124_2</b> |        |        |        |        |
| <b>group</b>                  | <b>ATFI_S</b>  | <b>ATFI_S</b>  | <b>ATFI_S</b>  | <b>ATFI_S</b>  | <b>ATFI_S</b>  | <b>ATFI_S</b>  |        |        |        |        |
| Methyl_acetate                | 0.000          | 0.000          | 0.000          | 0.000          | 0.000          | 0.000          |        |        |        |        |
| Ethyl_Acetate                 | 0.000          | 0.000          | 0.000          | 0.000          | 0.000          | 0.000          |        |        |        |        |
| 2-Butanone                    | 0.339          | 0.192          | 0.044          | 0.054          | 0.103          | 0.092          |        |        |        |        |
| Butanal_3-methyl-             | 2.067          | 0.835          | 0.521          | 0.996          | 1.051          | 3.071          |        |        |        |        |
| Ethanol                       | 0.071          | 0.062          | 0.292          | 0.159          | 0.056          | 0.048          |        |        |        |        |
| Propanoic_acid_ethyl ester    | 0.000          | 0.000          | 0.449          | 0.000          | 0.000          | 0.000          |        |        |        |        |
| 2-Pentanone                   | 0.489          | 0.000          | 0.000          | 0.406          | 0.176          | 0.000          |        |        |        |        |
| Butanoic_acid_methyl ester    | 0.000          | 0.323          | 1.930          | 0.268          | 0.000          | 0.000          |        |        |        |        |
| Methyl_Isobutyl_Ketone        | 0.306          | 0.198          | 0.035          | 0.038          | 0.065          | 0.058          |        |        |        |        |
| a-Pinene                      | 0.470          | 0.101          | 0.000          | 0.000          | 0.000          | 0.000          |        |        |        |        |
| Disulfide_dimethyl            | 0.101          | 0.110          | 0.000          | 0.115          | 0.207          | 0.356          |        |        |        |        |
| Butanoic_acid_3-methyl- ethyl | 0.000          | 0.000          | 0.048          | 0.031          | 0.000          | 0.000          |        |        |        |        |
| Methyl_valerate               | 0.000          | 0.113          | 0.879          | 0.089          | 0.000          | 0.000          |        |        |        |        |
| b-Pinene                      | 0.475          | 0.683          | 0.000          | 0.000          | 0.000          | 0.000          |        |        |        |        |
| Butanoic_acid_propyl ester    | 0.000          | 0.843          | 0.988          | 0.168          | 0.000          | 0.000          |        |        |        |        |
| 3-Carene                      | 0.000          | 0.000          | 0.098          | 0.000          | 0.000          | 0.000          |        |        |        |        |
| Pentanoic_acid_ethyl ester    | 0.000          | 0.172          | 1.041          | 0.132          | 0.000          | 0.000          |        |        |        |        |



|                               |       |        |       |       |       |       |
|-------------------------------|-------|--------|-------|-------|-------|-------|
| (2E4E)-37-Dimethylocta-24-d   | 0.000 | 0.000  | 0.000 | 0.424 | 0.300 | 0.469 |
| a-Phellandrene                | 0.000 | 0.000  | 0.000 | 0.000 | 0.000 | 0.000 |
| b-Myrcene                     | 0.054 | 0.160  | 0.000 | 0.000 | 0.000 | 0.000 |
| Isovaleric_acid_propyl ester  | 0.000 | 0.000  | 0.268 | 0.092 | 0.000 | 0.000 |
| Terpinolene                   | 0.048 | 0.000  | 0.000 | 0.000 | 0.000 | 0.000 |
| 1-Butanol                     | 0.000 | 0.000  | 1.261 | 0.001 | 0.000 | 0.286 |
| D-Limonene                    | 9.192 | 10.764 | 0.446 | 0.000 | 1.461 | 0.278 |
| beta-Phellandrene             | 0.140 | 0.000  | 0.000 | 0.000 | 0.000 | 0.000 |
| Butanoic_acid_butyl ester     | 0.000 | 1.079  | 0.485 | 0.187 | 0.000 | 0.000 |
| Pentanoic_acid_propyl ester   | 0.000 | 0.000  | 0.854 | 0.134 | 0.000 | 0.000 |
| g-Terpinene                   | 2.491 | 0.960  | 0.000 | 0.000 | 0.000 | 0.000 |
| Hexanoic_acid_ethyl ester     | 0.103 | 0.568  | 1.215 | 0.278 | 0.020 | 0.000 |
| 1-Butanol_3-methyl-           | 0.000 | 0.000  | 0.000 | 0.000 | 0.000 | 0.469 |
| b-Ocimene                     | 0.000 | 0.000  | 0.000 | 0.000 | 0.000 | 0.000 |
| Styrene                       | 0.000 | 0.000  | 0.000 | 0.089 | 0.000 | 0.000 |
| p-Cymene                      | 0.232 | 0.090  | 0.000 | 0.000 | 0.000 | 0.000 |
| 2-Heptanone_5-methyl-         | 0.000 | 0.000  | 0.288 | 0.345 | 0.000 | 0.000 |
| 2-Carene                      | 0.000 | 0.034  | 0.179 | 0.000 | 0.000 | 0.317 |
| 1-Pentanol                    | 0.000 | 0.117  | 0.646 | 0.565 | 0.035 | 0.083 |
| Acetic_acid_hexyl ester       | 0.000 | 0.067  | 0.000 | 0.000 | 0.000 | 0.000 |
| Pentanoic_acid_4-methyl- pen  | 0.000 | 0.000  | 0.199 | 0.020 | 0.000 | 0.000 |
| Octanal                       | 0.000 | 0.155  | 0.000 | 0.000 | 0.000 | 0.109 |
| 2-Octanone                    | 0.183 | 0.000  | 0.411 | 0.000 | 0.117 | 0.000 |
| Acetoin                       | 0.000 | 0.000  | 0.000 | 2.395 | 0.000 | 0.146 |
| Pentanoic_acid_butyl ester    | 0.000 | 0.235  | 0.759 | 0.089 | 0.000 | 0.000 |
| Butanoic_acid_pentyl ester    | 0.000 | 0.237  | 0.000 | 0.080 | 0.000 | 0.000 |
| Hexanoic_acid_propyl ester    | 0.000 | 0.526  | 0.571 | 0.293 | 0.000 | 0.000 |
| Tridecane                     | 0.000 | 0.018  | 0.000 | 0.000 | 0.044 | 0.061 |
| 5-Hepten-2-one_6-methyl-      | 1.823 | 0.481  | 0.079 | 2.065 | 1.208 | 1.173 |
| Heptanoic_acid_ethyl ester    | 0.000 | 0.084  | 0.116 | 0.000 | 0.000 | 0.000 |
| Dimethyl_trisulfide           | 0.000 | 0.000  | 0.000 | 0.000 | 0.079 | 0.076 |
| Allyl_Isothiocyanate          | 0.000 | 0.000  | 0.000 | 0.000 | 0.000 | 0.000 |
| 2-Hydroxy-3-pentanone         | 0.000 | 0.000  | 0.000 | 0.000 | 0.000 | 0.087 |
| Hexanoic_acid_isobutyl ester  | 0.000 | 0.049  | 0.000 | 0.000 | 0.000 | 0.000 |
| 2-butyl-1-octanol             | 0.138 | 0.000  | 0.000 | 0.000 | 0.013 | 0.008 |
| Cyclohexanecarboxylic acid_me | 0.000 | 0.000  | 0.455 | 0.000 | 0.000 | 0.000 |
| 1-Hexanol                     | 0.000 | 0.450  | 1.296 | 1.941 | 0.148 | 0.289 |
| Nonanal                       | 0.116 | 0.703  | 0.501 | 0.558 | 0.325 | 0.552 |
| 2-Nonanone                    | 0.000 | 0.000  | 0.000 | 0.089 | 0.000 | 0.000 |

|                               |       |        |        |        |        |       |
|-------------------------------|-------|--------|--------|--------|--------|-------|
| Cyclohexanecarboxylic acid et | 0.000 | 0.000  | 0.449  | 0.000  | 0.000  | 0.000 |
| Perillene                     | 0.037 | 0.000  | 0.000  | 0.039  | 0.000  | 0.030 |
| Pentanoic_acid_pentyl ester   | 0.000 | 0.000  | 0.000  | 0.000  | 0.000  | 0.000 |
| Hexanoic_acid_butyl ester     | 0.000 | 0.523  | 0.638  | 0.000  | 0.000  | 0.000 |
| Butanoic_acid_hexyl ester     | 0.000 | 1.213  | 0.248  | 0.577  | 0.000  | 0.000 |
| Tetradecane                   | 1.002 | 0.325  | 0.086  | 0.000  | 0.144  | 0.635 |
| Octanoic_acid_ethyl ester     | 0.000 | 0.000  | 0.000  | 0.000  | 0.000  | 0.000 |
| Acetic_acid                   | 4.151 | 6.339  | 9.645  | 8.642  | 8.368  | 4.570 |
| (+)-2-Bornanone               | 0.000 | 0.000  | 0.000  | 0.000  | 0.000  | 0.000 |
| 2-Decanone                    | 0.022 | 0.000  | 0.000  | 0.000  | 0.000  | 0.000 |
| Benzaldehyde                  | 0.940 | 0.587  | 0.637  | 0.794  | 0.366  | 2.017 |
| 1-Hexanol_2-ethyl-            | 0.000 | 0.000  | 0.000  | 0.000  | 0.000  | 0.000 |
| 2-Nonenal_(E)-                | 0.015 | 0.219  | 0.237  | 0.000  | 0.200  | 0.074 |
| Pentadecane                   | 0.758 | 0.000  | 0.000  | 0.000  | 0.000  | 0.000 |
| Propanoic_acid                | 1.583 | 3.724  | 9.118  | 8.807  | 4.025  | 2.124 |
| Caparratriene                 | 0.000 | 0.000  | 0.000  | 0.000  | 0.000  | 0.000 |
| 1-Pentadecene                 | 0.408 | 0.064  | 0.000  | 0.552  | 0.280  | 0.307 |
| Linalool                      | 0.000 | 0.000  | 0.128  | 0.000  | 0.000  | 0.000 |
| Propanoic_acid_2-methyl-      | 1.540 | 1.364  | 1.020  | 2.545  | 2.996  | 1.035 |
| Caryophyllene                 | 1.089 | 0.268  | 3.103  | 0.000  | 0.300  | 1.498 |
| Methyl_carvacrol              | 0.000 | 0.000  | 0.000  | 0.000  | 0.000  | 0.000 |
| Dichloroacetic_acid_4-pentade | 0.169 | 0.000  | 0.002  | 0.144  | 0.109  | 0.000 |
| 2-Undecanone                  | 0.580 | 0.198  | 0.369  | 0.337  | 0.196  | 0.430 |
| 159-Decatriene_2358-tetr      | 0.479 | 0.000  | 0.000  | 0.000  | 0.000  | 0.000 |
| Benzeneacetaldehyde           | 0.000 | 0.000  | 0.000  | 0.000  | 0.000  | 0.501 |
| Butanoic_acid                 | 7.714 | 22.550 | 35.748 | 47.662 | 14.384 | 7.611 |
| Hexadecane                    | 0.460 | 0.000  | 0.000  | 0.192  | 0.210  | 0.331 |
| Levomenthol                   | 0.133 | 0.179  | 0.000  | 0.000  | 0.000  | 0.344 |
| Hexanoic_acid_2-methyl-       | 7.996 | 5.740  | 3.531  | 9.104  | 7.493  | 4.706 |
| Cetene                        | 0.142 | 0.015  | 0.000  | 0.269  | 0.066  | 0.000 |
| Valencene                     | 1.188 | 0.146  | 0.000  | 0.270  | 1.220  | 2.878 |
| a-Murolene                    | 0.000 | 0.000  | 0.000  | 0.000  | 0.000  | 0.000 |
| b-Bisabolene                  | 0.305 | 0.127  | 0.000  | 0.000  | 0.000  | 0.000 |
| Nonadecane                    | 0.000 | 0.000  | 0.176  | 0.466  | 0.000  | 0.000 |
| Pentanoic_acid                | 6.184 | 7.472  | 16.446 | 28.087 | 6.158  | 3.832 |
| g-Cadinene                    | 0.000 | 0.000  | 0.000  | 0.000  | 0.000  | 0.000 |
| trans-g-Bisabolene            | 2.414 | 0.000  | 1.738  | 0.000  | 0.000  | 0.000 |
| trans-a-Bisabolene            | 0.000 | 0.000  | 0.273  | 0.000  | 0.000  | 0.000 |
| Aromandendrene                | 0.262 | 0.111  | 0.045  | 0.142  | 0.113  | 0.000 |
| Pentanoic_acid_4-methyl-      | 0.000 | 0.081  | 1.544  | 4.870  | 0.145  | 0.153 |
| Germacrene_B                  | 0.000 | 0.000  | 0.000  | 0.000  | 0.000  | 0.000 |
| Anethole                      | 0.247 | 0.044  | 0.306  | 0.048  | 0.127  | 0.000 |
| 2-Tridecanone                 | 0.481 | 0.103  | 0.342  | 0.364  | 0.292  | 0.355 |

|                               |        |        |        |        |        |        |
|-------------------------------|--------|--------|--------|--------|--------|--------|
| Octadecane                    | 0.000  | 0.000  | 0.000  | 0.000  | 0.000  | 0.000  |
| Hexanoic_acid                 | 6.794  | 21.310 | 35.953 | 76.418 | 11.985 | 8.194  |
| 59-Undecadien-2-one 610-dim   | 0.000  | 0.312  | 0.394  | 0.238  | 0.185  | 0.202  |
| 2-Tetradecanone               | 0.000  | 0.000  | 0.269  | 0.313  | 0.143  | 0.338  |
| Phenylethyl_Alcohol           | 0.376  | 0.146  | 0.000  | 0.242  | 0.216  | 0.450  |
| 2-Tetradecanone               | 0.110  | 0.000  | 0.000  | 0.000  | 0.187  | 0.154  |
| Heptanoic_acid                | 2.093  | 3.933  | 14.746 | 35.855 | 3.570  | 2.954  |
| Phenol                        | 0.394  | 0.320  | 4.182  | 3.350  | 0.242  | 0.345  |
| 2-Pentadecanone               | 0.475  | 0.110  | 0.276  | 0.349  | 0.461  | 0.732  |
| 3-Phenylpropanol              | 0.066  | 0.070  | 0.000  | 0.004  | 0.000  | 0.013  |
| Octanoic_acid                 | 0.279  | 0.531  | 0.930  | 6.926  | 0.923  | 0.297  |
| Phenol_2-methyl-              | 95.079 | 46.707 | 1.895  | 29.816 | 73.469 | 69.530 |
| 2-Hexadecanone                | 0.000  | 0.000  | 0.000  | 0.000  | 0.000  | 0.084  |
| 2-Piperidinone                | 0.404  | 0.228  | 0.000  | 0.000  | 0.000  | 0.000  |
| 2-Tridecanol                  | 0.207  | 0.000  | 0.001  | 0.029  | 0.001  | 0.200  |
| Nonanoic_acid                 | 2.216  | 0.473  | 0.474  | 14.600 | 4.281  | 6.372  |
| Carvacrol                     | 0.000  | 0.000  | 0.000  | 0.000  | 0.000  | 0.000  |
| Ethanone_1-(2-aminophenyl)-   | 0.778  | 0.000  | 0.000  | 0.000  | 0.140  | 0.121  |
| 1H-Pyrrole-25-dione_2         | 0.387  | 0.126  | 0.428  | 0.182  | 0.652  | 1.332  |
| 1-Tetracosene                 | 0.309  | 0.000  | 0.000  | 0.000  | 0.000  | 0.969  |
| n-Decanoic_acid               | 0.194  | 0.000  | 0.074  | 0.458  | 0.000  | 0.000  |
| 1-Hexadecanol                 | 2.233  | 0.363  | 0.462  | 2.334  | 1.200  | 2.664  |
| (Z)6-Pentadecen-1-ol          | 0.070  | 0.000  | 1.491  | 1.620  | 0.000  | 0.663  |
| g-Dodecalactone               | 0.564  | 0.633  | 0.593  | 0.350  | 0.538  | 0.274  |
| Indole                        | 15.666 | 12.457 | 3.897  | 5.969  | 12.462 | 25.892 |
| 1H-Indole_5-methyl-           | 0.000  | 7.104  | 6.399  | 18.480 | 21.288 | 29.156 |
| Benzeneacetic_acid            | 0.354  | 0.223  | 0.000  | 0.000  | 0.000  | 0.000  |
| Benzenepropanoic_acid_silver( | 0.393  | 0.262  | 0.835  | 1.378  | 1.225  | 0.289  |
| 2H-Indol-2-one_13-dihydro-    | 0.322  | 0.173  | 0.055  | 0.100  | 0.292  | 0.216  |

**Table S2. Statistically significant different VOCs in the two sample groups.** Statistically significant VOC emerged from fold change (FC) and Wilcoxon rank-sum test combined analysis. For each variable fold change, log2(FC), the raw p-value (reported as raw p-value) and  $-\log_{10}(p)$  i.e. the level of significance have been reported.

| VOC                        | FC      | log2(FC) | raw.pval   | $-\log_{10}(p)$ |
|----------------------------|---------|----------|------------|-----------------|
| 5-Hepten-2-one_6-methyl-   | 0.13801 | -2.8571  | 5.9172E-06 | 5.2279          |
| Methyl valerate            | 7.254   | 2.8588   | 0.0012099  | 2.9173          |
| Butanoic acid methyl ester | 6.7258  | 2.7497   | 0.0022201  | 2.6536          |
| 2-Piperidinone             | 5.0665  | 2.341    | 0.0045542  | 2.3416          |
| Cetene                     | 0.27024 | -1.8877  | 0.0054196  | 2.266           |
| Perillene                  | 0.14852 | -2.7513  | 0.0075755  | 2.1206          |
| 1-Pentadecene              | 0.26017 | -1.9425  | 0.008292   | 2.0813          |
| Pentanoic acid ethyl ester | 7.1731  | 2.8426   | 0.0095004  | 2.0223          |
| Levomenthol                | 2.5802  | 1.3675   | 0.021809   | 1.6614          |
| Dimethyl trisulfide        | 0.46854 | -1.0938  | 0.024503   | 1.6108          |
| Butanoic acid butyl ester  | 7.681   | 2.9413   | 0.026669   | 1.574           |
| Anethole                   | 0.21297 | -2.2313  | 0.029753   | 1.5265          |
| Butanoic acid propyl ester | 17.426  | 4.1232   | 0.029825   | 1.5254          |
| 1-Butanol 3-methyl-        | 0.45345 | -1.141   | 0.037255   | 1.4288          |
| Tridecane                  | 0.39358 | -1.3453  | 0.041799   | 1.3788          |
| Pentanoic acid butyl ester | 8.3522  | 3.0622   | 0.043704   | 1.3595          |
| 159-Decatriene_2358-tetr   | 0.27422 | -1.8666  | 0.044854   | 1.3482          |
| Heptanoic acid ethyl ester | 2.2212  | 1.1513   | 0.046029   | 1.337           |

**Table S3. MaAsLin supporting statistics.** Statistically significant taxa ( $p < 0.05$ ) plus coef=effect estimate coefficient, stderr=standard error, N=number of sample, N.not.0=number of sample value different from 0, pval=p value, qval=corrected p.

| Taxa                            | value       | coef    | stderr | N  | N.not.0 | pval   | qval   |
|---------------------------------|-------------|---------|--------|----|---------|--------|--------|
| f__Peptococcaceae_g__uncultured | LGMID_ATFIS | 0.4738  | 0.1130 | 46 | 19      | 0.0001 | 0.0206 |
| o__Bacteroidales;f__g__         | LGMID_ATFIS | 0.7964  | 0.2357 | 46 | 39      | 0.0015 | 0.0344 |
| g__Rikenellaceae_RC9_gut_group  | LGMID_ATFIS | 0.6065  | 0.1763 | 46 | 8       | 0.0013 | 0.0344 |
| g__Catenibacterium              | LGMID_ATFIS | 0.2717  | 0.0804 | 46 | 8       | 0.0015 | 0.0344 |
| g__UCG2                         | LGMID_ATFIS | 0.5843  | 0.1704 | 46 | 45      | 0.0013 | 0.0344 |
| g__UCG10                        | LGMID_ATFIS | 0.8424  | 0.2431 | 46 | 34      | 0.0012 | 0.0344 |
| g__Family_XIII_AD3011_group     | LGMID_ATFIS | 0.5263  | 0.1527 | 46 | 36      | 0.0013 | 0.0344 |
| g__GCA900066575                 | LGMID_ATFIS | 0.4147  | 0.1271 | 46 | 32      | 0.0021 | 0.0420 |
| g__Haemophilus                  | LGMID_ATFIS | -0.6818 | 0.2123 | 46 | 23      | 0.0025 | 0.0432 |
| g__Sanguibacteroides            | LGMID_ATFIS | 0.3629  | 0.1236 | 46 | 16      | 0.0053 | 0.0585 |
| g__Erysipelotrichaceae_UCG3     | LGMID_ATFIS | -0.4867 | 0.1679 | 46 | 43      | 0.0058 | 0.0585 |
| g__RF39                         | LGMID_ATFIS | 0.6212  | 0.2054 | 46 | 17      | 0.0041 | 0.0585 |
| g__Clostridia_vadinBB60_group   | LGMID_ATFIS | 0.7399  | 0.2560 | 46 | 37      | 0.0060 | 0.0585 |
| g__Dorea                        | LGMID_ATFIS | 0.3317  | 0.1135 | 46 | 44      | 0.0055 | 0.0585 |
| g__Tyzzerella                   | LGMID_ATFIS | 0.4570  | 0.1547 | 46 | 20      | 0.0050 | 0.0585 |
| g__Eubacterium_hallii_group     | LGMID_ATFIS | 0.2858  | 0.0966 | 46 | 44      | 0.0050 | 0.0585 |
